# Supplementary material for: Exceptional parallelisms characterize the evolutionary transition to live birth in phrynosomatid lizards
Source: Research Square preprint supplement (doi:10.21203/rs.3.rs-127587/v1), 2021-01-12
Supplement: Supplementary file 3 [file faa1921ef93223a2f7dbddb6.xlsx]

## Sheet: Data
		Parity mode		Thermal physiology and effectiveness of temperature regulation															Mass-specific metabolic rate							Morphology and life history traits					Mass-specific production
Sp_Num	Species	Parity mode	References	Lat.	Long.	Alt (m)	bio1	bio10	bio11	Mean Tb	Mean Tpref	Mean CTmin	Mean CTmax	Mean Te			E	References	Mean SVL females	References	Mean body mass females	References	Individual metabolic rate	Mass-specific metabolic rate	Notes	Mean SVL females	Mean SVL neonates	Clutch or litter size	# Clutches or litters per year	References	Clutch or litter size	mass hatchling	mass female	References	Mass-specific production
1	Callisaurus draconoides	Oviparous	Lambert and Wiens (2013)	31.132	-114.942	72	22.39	30.28	14.92	38.9 ± 0.27 (99)	35.8 ± 0.43 (64)	13.3 ± 0.55 (10)	43.1 ± 0.14 (12)	40.1	1.48	5.02	0.71	Pérez-Delgadillo (unpubl. Data)	61.4 ± 1.5 (23)	This study	6.5 ± 0.7 (23)	This study	0.178245	0.0274224	We used mean SVL and mean body mass of this species to performed the equation provided in the section Mass-specific metabolic rate(Methods)	75	29	4.42	2	Pianka and Parker (1972), Tanner and Krogh (1975)	4.335	1.09648	11.2202	Meiri et al., 2020	0.847265
2	Cophosaurus texanus	Oviparous	Lambert and Wiens (2013)	26.682	-103.748	1161	20.22	26.42	12.75	38 ± 0.49 (23)	37.1 ± 0.25 (47)	15.4	44.4	37	1.09	8.56	0.87	This study, Bashey and Dunham (1997)	60	Ballinger et al. (1972)	7.98	-	0.194219	0.0243467	For this species, we predicted body mass from SVL with the equation provided in the section Mass-specific metabolic rate (Methods)	60	22	6.1 ± 0.3 (70)	2	Ballinger et al. (1972)	4.55	0.660693	6.60693	Meiri et al., 2020	0.91
3	Holbrookia approximans	Oviparous	Lemos-Espinal et al. (2015)	-	-	-	-	-	-	-	-	-	-	-	-	-	-	-	-	-	-	-	-	-	-	-	-	-	-	-	-	-	-	-	-
4	Holbrookia elegans	Oviparous	Lambert and Wiens (2013)	29.149	-110.95	348	22.69	30.23	15.4	-	38.5 ± 0.4 (30)	-	-	-	-	-	-	Valle-Jiménez & Lara-Reséndiz (unpubl. Data)	57.7 ± 0.5 (43)	Goldberg (2010)	7	-	-	-	For this species, we predicted body mass from SVL with the equation provided in the section Mass-specific metabolic rate (Methods)	57.7 ± 0.5 (43)	-	8.22 ± 0.5 (23)	2	Goldberg (2010)	5	0.776247	6.0256	Meiri et al., 2020	1.28825
5	Holbrookia lacerata	Oviparous	Lambert and Wiens (2013)	-	-	-	-	-	-	-	-	-	-	-	-	-	-	-	-	-	-	-	-	-	-	-	-	-	-	-	-	-	-	-	-
6	Holbrookia maculata	Oviparous	Lambert and Wiens (2013)	26.556	-104.223	1137	19.42	25.9	11.73	39.9 ± 0.6 (21)	36.3 ± 0.3 (20)	-	46.5 ± 0.65	40.4	2.5	7.5	0.66	This study, Sena (1978)	54.8 ± 0.6 (215)	Jones and Ballinger (1987)	5.89	-	0.178301	0.0302968	For this species, we predicted body mass from SVL with the equation provided in the section Mass-specific metabolic rate (Methods)	54.8 ± 0.6 (215)	24	4.53 ± 0.2 (215)	2	Jones and Ballinger (1987)	7.15	0.47863	6.16595	Meiri et al., 2020	1.11003
7	Holbrookia propinqua	Oviparous	Lambert and Wiens (2013)	26.168	-97.178	1	22.21	27.88	15.5	37.9 ± 0.04 (908)	-	-	-	-	-	-	-	Judd (1975)	48.82 (73)	Judd and Ross (1978)	3.99	-	0.114725	0.0287261	For this species, we predicted body mass from SVL with the equation provided in the section Mass-specific metabolic rate (Methods)	48.82 (73)	27	4.65 (75)	-	Judd (1975), Judd and Ross (1978)	3.7	0.912011	5.37032	Meiri et al., 2020	0.62835
8	Petrosaurus mearnsi	Oviparous	Lambert and Wiens (2013)	-	-	-	-	-	-	36 (1)	-	-	-	-	-	-	-	Brattstrom (1965)	-	-	-	-	-	-	-	-	-	-	-	-	4	1.54882	15.1356	Meiri et al., 2020	0.409317
9	Petrosaurus repens	Oviparous	Grismer (2002)	-	-	-	-	-	-	-	-	-	-	-	-	-	-	-	-	-	-	-	-	-	-	-	-	-	-	-	-	-	-	-	-
10	Petrosaurus thalassinus	Oviparous	Lambert and Wiens (2013)	23.555	-109.86	500	20.77	25.88	15.78	35.7 ± 0.36 (30)	31.3 ± 0.4 (31)	17.1 ± 0.4 (10)	39.6 ± 0.4 (9)	29.4	0.5	1.9	0.74	This study	101.6 ± 3.4 (12)	This study	29.7 ± 3.4 (12)	This study	0.436998	0.0147137	We used mean SVL and mean body mass of this species to performed the equation provided in the section Mass-specific metabolic rate(Methods)	94.8 ± 3.8 (10)	35 ± 1 (2)	8.6 ± 1.2 (10)	-	Goldberg and Beaman (2004)	8.6	1.44544	26.9153	Meiri et al., 2020	0.461847
11	Phrynosoma asio	Oviparous	Lambert and Wiens (2013)	17.63	-99.526	1200	24.1	26.1	22.22	33.4 ± 0.3 (175)	35.9 ± 1.5 (67)	11.8 ± 0.6 (17)	44.8 ± 0.4 (18)	28.3	1.8	8.02	0.78	This study, Arenas-Moreno (2014)	99.6 ± 1.9 (20)	This study	50.4 ± 2.5 (20)	This study	0.544005	0.0107938	We used mean SVL and mean body mass of this species to performed the equation provided in the section Mass-specific metabolic rate(Methods)	97.5 ± 1.9 (44)	31.5 ± 0.3 (20)	17.5 ± 0.6 (49)	-	This study, García-Pareja (2017)	16.9	1.8197	33.1131	Meiri et al., 2020	0.928724
12	Phrynosoma blainvillii	Oviparous	Lambert and Wiens (2013)	31.921	-116.609	235	17.1	22.42	13.18	-	37.6 ± 0.39 (5)	-	-	-	-	-	-	Lara-Reséndiz et al. (2015a)	73.5 ± 0.5 (2)	This study	26 ± 3.5 (2)	This study	-	-	We used mean SVL and mean body mass of this species to performed the equation provided in the section Mass-specific metabolic rate(Methods)	72.3 (31)	25	12.4 ± 0.83 (9)	2	Howard (1974), Hult and Germano (2015), Phrynosoma coronatum = P. blainvillii	15.5	0.954993	16.2181	Meiri et al., 2020	1.82542
13	Phrynosoma braconnieri	Viviparous	Lambert and Wiens (2013)	17.33	-96.48	2030	17.06	19.22	14.97	31.5 ± 0.48	35.8 (20)	-	-	-	1.76	10.2	0.8	Hernández-Ríos (2016)	66.2 (18)	Zamudio and Parra-Olea (2000)	11.1	-	0.150675	0.01358	For this species, we predicted body mass from SVL with the equation provided in the section Mass-specific metabolic rate (Methods)	66.2 (18)	23.7	7 (9)	1	Zamudio and Parra-Olea (2000)	-	-	-	-	-
14	Phrynosoma cerroense	Oviparous	Lambert and Wiens (2013)	31.039	-115.765	882	16.09	22.82	10.6	37.9 ± 0.8 (8)	33.8 ± 0.46 (12)	7.4 ± 0.3 (10)	40.8 ± 0.4 (5)	35.8	2.4	6.7	0.65	This study	75.9 ± 10.3 (3)	This study	25.5 ± 8.4 (3)	This study	0.460816	0.0180712	We used mean SVL and mean body mass of this species to performed the equation provided in the section Mass-specific metabolic rate(Methods)	78.8 ± 8.1 (6)	-	-	-	This study	-	-	-	-	-
15	Phrynosoma cornutum	Oviparous	Lambert and Wiens (2013)	30.825	-108.474	1435	15.99	24.77	7.37	33.4 ± 0.45 (83)	34.2 ± 0.1 (97)	9.46 (10)	47.9 (10)	31.1	2.9	4.8	0.39	Prieto and Whitford (1971), Lara-Reséndiz et al. (2015b)	90.9 (24)	Hughes et al. (2018)	32.15	-	0.388294	0.0120778	For this species, we predicted body mass from SVL with the equation provided in the section Mass-specific metabolic rate (Methods)	90.9 (24)	22.6	24.6 (38)	-	Hughes et al. (2018)	27.9	0.47863	16.9824	Meiri et al., 2020	0.786329
16	Phrynosoma coronatum	Oviparous	Lambert and Wiens (2013)	23.969	-109.938	29	23.67	29.98	17.65	36.7 ± 0.72 (22)	34.7 ± 0.29 (31)	12.8 ± 0.47 (20)	44.4 ± 0.23 (12)	-	1.8	8.3	0.79	Ramírez-Enríquez (2018)	96.3 ± 1 (15)	Ramírez-Enríquez (2018)	39.02	-	0.578811	0.0148345	For this species, we predicted body mass from SVL with the equation provided in the section Mass-specific metabolic rate (Methods)	96.3 ± 1 (15)	27	12 (1)	-	Goldberg (2011), Ramírez-Enríquez (2018)	11.8	1.04713	18.197	Meiri et al., 2020	0.679019
17	Phrynosoma ditmarsi	Viviparous	Lambert and Wiens (2013)	-	-	-	-	-	-	-	-	-	-	-	-	-	-	-	90 (1)	Lowe and Howard (1975)	31.09	-	-	-	For this species, we predicted body mass from SVL with the equation provided in the section Mass-specific metabolic rate (Methods)	90 (1)	26 ± 0.3 (9)	9 (1)	-	Lowe and Howard (1975)	7.5	0.812831	12.5893	Meiri et al., 2020	0.484241
18	Phrynosoma douglasii	Viviparous	Lambert and Wiens (2013)	47.098*	-120.151*	844	8	18.3	-2	33.9	35.8	-	-	-	-	-	-	Lahti et al. (2010), Rathburn et al. (2015)	48 ± 0.08 (63)	Lahti et al. (2010)	3.77	-	0.0809416	0.0214522	For this species, we predicted body mass from SVL with the equation provided in the section Mass-specific metabolic rate (Methods)	48 ± 0.08 (63)	24 ± 0.2 (17)	-	-	Lahti et al. (2010)	15	0.363078	12.8825	Meiri et al., 2020	0.422757
19	Phrynosoma goodei	Oviparous	Lambert and Wiens (2013)	31.537	-113.453	60	23.25	31.83	15.22	38.1 ± 0.38 (40)	34.9 ± 0.18 (30)	-	-	43	1.5	8.3	0.82	Lara-Resendiz et al. (2014b)	73.5	Howard (1974), Phrynosoma platyrhinos = P. goodei	15.76	-	0.326104	0.0206914	For this species, we predicted body mass from SVL with the equation provided in the section Mass-specific metabolic rate (Methods)	73.5	27.5	5.6 ± 0.3 (37)	2	Howard (1974), Phrynosoma platyrhinos = P. goodei	-	-	-	-	-
20	Phrynosoma hernandesi	Viviparous	Lambert and Wiens (2013)	31.952*	-104.849*	2290	12.23	20.37	3.87	35.5 ± 0.21 (178)	35	2.75 (10)	43.5 (10)	-	-	-	-	Prieto and Whitford (1971), Christian (1998), P. douglassii= P. hernandesi	69	Pianka and Parker (1975), Phrynosoma douglassii = P. hernandesi	12.75	-	0.228234	0.0179008	For this species, we predicted body mass from SVL with the equation provided in the section Mass-specific metabolic rate (Methods)	69	25	16.7 (11)	-	Goldberg (1971), Pianka and Parker (1975), Phrynosoma douglassii = P. hernandesi	18	0.851138	15.4882	Meiri et al., 2020	0.989174
21	Phrynosoma mcallii	Oviparous	Lambert and Wiens (2013)	-	-	-	-	-	-	37.8 ± 0.13 (473)	-	-	-	-	-	-	-	Pianka and Parker (1975)	68.6 ± 1 (24)	Wone and Beauchamp (2003)	12.5	-	0.267988	0.0214329	For this species, we predicted body mass from SVL with the equation provided in the section Mass-specific metabolic rate (Methods)	68.6 ± 1 (24)	36.5	4.7 ± 0.16 (31)	2	Howard (1974), Wone and Beauchamp (2003)	4.95	1.7378	11.749	Meiri et al., 2020	1.46432
22	Phrynosoma modestum	Oviparous	Lambert and Wiens (2013)	31.476	-106.476	1260	16.83	26.67	6.68	31.9 ± 0.93 (24)	33.6 ± 0.51 (8)	-	-	-	1.4	7.3	0.8	Lara-Reséndiz et al. (2015b)	42.5 ± 1.8 (9)	Hernández-Ibarra and Ramírez-Bautista (2002)	2.51	-	0.0509775	0.0203239	For this species, we predicted body mass from SVL with the equation provided in the section Mass-specific metabolic rate (Methods)	42.5 ± 1.8 (9)	21.6 ± 0.5 (2)	10.6 ± 0.4 (40)	-	Pianka and Parker (1975), Hernández-Ibarra and Ramírez-Bautista (2002)	11	0.371535	7.4131	Meiri et al., 2020	0.551306
23	Phrynosoma orbiculare	Viviparous	Lambert and Wiens (2013)	20.064	-98.201	2502	13.4	15.5	11.07	30.8 ± 1.1 (22)	31.4 ± 0.38 (22)	4.5 ± 0.23 (19)	37.8 ± 0.23 (19)	30.5	2.03	10.9	0.81	Pardo-Ramírez (unpubl. Data)	75.4 ± 1.4 (14)	This study	28 ± 1.6 (14)	This study	0.285464	0.0101951	We used mean SVL and mean body mass of this species to performed the equation provided in the section Mass-specific metabolic rate(Methods)	75.2 ± 2.3 (14)	26.1 ± 0.1 (116)	8.3 ± 0.6 (14)	1	Suárez-Rodríguez et al. (2018)	12.65	0.912011	12.8825	Meiri et al., 2020	0.895551
24	Phrynosoma platyrhinos	Oviparous	Lambert and Wiens (2013)	40.6	-112.5	1365	10.98	23.5	-0.82	34.9 ± 0.22 (211)	36 (1)	-	-	-	-	-	-	Pianka and Parker (1975)	81	Pianka and Parker (1975)	21.83	-	0.326269	0.0149426	For this species, we predicted body mass from SVL with the equation provided in the section Mass-specific metabolic rate (Methods)	81	27.4 (13)	7.7 (116)	2	Pianka and Parker (1975)	5.515	0.851138	17.378	Meiri et al., 2020	0.540226
25	Phrynosoma sherbrookei	Viviparous	Nieto-Montes de Oca et al. (2014)	17.552	-99.269	1997	21.61	23.18	20.12	33.8 ± 0.8 (9)	36.5 ± 0.54 (9)	12 ± 0.5 (9)	43.1 ± 0.64 (7)	31.4	2.2	4.6	0.52	This study	56 ± 1.4 (4)	This study	11.3 ± 0.7 (4)	This study	0.182846	0.0161811	We used mean SVL and mean body mass of this species to performed the equation provided in the section Mass-specific metabolic rate(Methods)	59	26.6	5.5	1	This study	5.5	0.96	9	This study	0.586667
26	Phrynosoma solare	Oviparous	Lambert and Wiens (2013)	28.964	-111.067	160	23.27	31.22	15.45	37 ± 3.4 (18)	37.5 ± 0.12 (26)	-	-	-	1.13	9.99	0.89	This study, Verdugo-Molina (2014), Lara-Reséndiz et al. (2015a)	102 (5)	Parker (1971)	47.32	-	0.684373	0.0144623	For this species, we predicted body mass from SVL with the equation provided in the section Mass-specific metabolic rate (Methods)	102 (5)	29.3	20.5	-	Parker (1971)	18.6	1.31826	28.1838	Meiri et al., 2020	0.869987
27	Phrynosoma taurus	Viviparous	Lambert and Wiens (2013)	17.627	-99.526	1200	24.1	26.1	22.22	33.2 ± 0.73 (33)	34.4 ± 0.23 (33)	12.3 ± 0.6 (11)	44 ± 0.4 (11)	28.3	1.3	6.3	0.79	This study, Arenas-Moreno (2014)	72 ± 4.6 (3)	This study	21.5 ± 6.5 (3)	This study	0.282714	0.0131495	We used mean SVL and mean body mass of this species to performed the equation provided in the section Mass-specific metabolic rate(Methods)	78 (18)	26 (8)	12.25 ± 1.7 (4)	1	Zamudio and Parra-Olea (2000), Beltrán-Sánchez et al. (2005)	11.33	0.88	18.03	Beltrán-Sánchez et al., 2005	0.552989
28	Sceloporus acanthinus	Viviparous	Méndez-de la Cruz et al. (1998)	-	-	-	-	-	-	-	-	-	-	-	-	-	-	-	-	-	-	-	-	-	-	-	-	-	-	-	-	-	-	-	-
29	Sceloporus adleri	Viviparous	Lambert and Wiens (2013)	17.586	-99.837	2668	15.86	17.15	14.3	30.8 ± 0.5 (41)	32.3 ± 0.44 (27)	9.6 ± 0.5 (7)	39 ± 0.7 (7)	17.8	1.9	14	0.86	This study	63.11 (23)	Jiménez-Arcos et al. (2017)	9.45	-	0.126415	0.0133755	For this species, we predicted body mass from SVL with the equation provided in the section Mass-specific metabolic rate (Methods)	63.11 (23)	-	6.57	1	Jiménez-Arcos et al. (2017)	-	-	-	-	-
30	Sceloporus aeneus	Oviparous	Lambert and Wiens (2013)	19.199	-99.847	3220	10.34	11.82	8.08	29.9 ± 0.35 (104)	34.4 ± 0.12 (61)	12.9 ± 0.38 (10)	39.8 ± 0.69 (10)	17.4	4	16.8	0.76	This study, Lara-Reséndiz (2008)	49.6 ± 0.8 (20)	This study	3.5 ± 0.2 (20)	This study	0.0558742	0.0159641	We used mean SVL and mean body mass of this species to performed the equation provided in the section Mass-specific metabolic rate(Methods)	50.2 ± 0.06 (57)	20	6.74 ± 0.3 (19)	2	Manríquez-Morán et al. (2013)	6.66	0.616595	4.57088	Meiri et al., 2020	1.79682
31	Sceloporus albiventris	Oviparous	Lambert and Wiens (2013)	-	-	-	-	-	-	-	-	-	-	-	-	-	-	-	-	-	-	-	-	-	-	-	-	-	-	-	-	-	-	-	-
32	Sceloporus anahuacus	Viviparous	Arriaga-Nava (2010)	19.221	-99.286	3500	10.3	11.67	8.25	30.9 ± 0.1 (119)	32.6 ± 0.9 (10)	-	-	-	-	-	-	Ávila-Bocanegra et al. (2012), Lara-Reséndiz and García-Vázquez (2013)	43.8 ± 0.6	Arriaga-Nava (2013)	2.78	-	0.0508246	0.0183147	For this species, we predicted body mass from SVL with the equation provided in the section Mass-specific metabolic rate (Methods)	43.8 ± 0.6	21.7 (29)	3.5 ± 0.19 (48)	1	Arriaga-Nava (2010), Arriaga-Nava (2013)	-	-	-	-	-
33	Sceloporus angustus	Oviparous	Lambert and Wiens (2013)	-	-	-	-	-	-	-	-	-	-	-	-	-	-	-	62.8 ± 0.9 (5)	Goldberg (2014a)	9.3	-	-	-	For this species, we predicted body mass from SVL with the equation provided in the section Mass-specific metabolic rate (Methods)	62.8 ± 0.9 (5)	-	4 (1)	-	Goldberg (2014a)	-	-	-	-	-
34	Sceloporus arenicolus	Oviparous	Lambert and Wiens (2013)	32.939*	-103.954*	1177	16	25.83	6	34.1 ± 0.59 (43)	35.8 (8)	-	-	-	-	-	0.82	Sartorius et al. (2002)	53.8 (339)	Fitzgerald et al. (2011)	5.53	-	0.109539	0.0197992	For this species, we predicted body mass from SVL with the equation provided in the section Mass-specific metabolic rate (Methods)	53.8 (339)	28	5	2	Fitzgerald et al. (2011), Ryberg et al. (2012)	-	-	-	-	-
35	Sceloporus asper	Viviparous	Méndez-de la Cruz et al. (1998)	21.484	-104.994	1580	17.63	20.15	14.72	32.2 ± 1.1 (12)	29 ± 0.77 (13)	10.6 ± 0.4 (10)	38.2 ± 0.4 (7)	22.2	0.5	2	0.74	This study	-	-	-	-	-	-	-	-	-	-	-	-	-	-	-	-	-
36	Sceloporus aurantius	Oviparous	Grummer and Bryson (2014)	-	-	-	-	-	-	-	-	-	-	-	-	-	-	-	50.8 (7)	Grummer and Bryson (2014)	4.56	-	-	-	For this species, we predicted body mass from SVL with the equation provided in the section Mass-specific metabolic rate (Methods)	50.8 (7)	-	-	-	Grummer and Bryson (2014)	-	-	-	-	-
37	Sceloporus aureolus	Viviparous	Lambert and Wiens (2013)	-	-	-	-	-	-	-	-	-	-	-	-	-	-	-	-	-	-	-	-	-	-	-	-	-	-	-	-	-	-	-	-
38	Sceloporus bicanthalis	Viviparous	Lambert and Wiens (2013)	19.12	-99.747	4151	7.1	8.22	5.48	27.8 ± 0.31 (157)	34.2 ± 0.13 (82)	12.6 ± 0.99 (10)	41.5 ± 0.28 (10)	15.5	5.8	17.9	0.68	This study, Lara-Reséndiz (2008)	46.1 ± 1.5 (37)	This study	3 ± 0.2 (37)	This study	0.0420623	0.0140208	We used mean SVL and mean body mass of this species to performed the equation provided in the section Mass-specific metabolic rate(Methods)	52.1 ± 0.5 (68)	20	7.21 ± 0.3 (68)	1	Rodríguez-Romero (2004)	7.21	0.19	3.06	Rodriguez-Romero, 2004	0.44768
39	Sceloporus bimaculosus	Oviparous	Meiri et al. (2020)	-	-	-	-	-	-	-	-	-	-	-	-	-	-	-	-	-	-	-	-	-	-	-	-	-	-	-	6.5	1.90546	25.1189	Meiri et al., 2020	0.493075
40	Sceloporus binocularis	Viviparous	Martínez-Méndez et al. (2019)	25.604	-100.35	1283	19.13	23.73	13.7	32.2 ± 1.5 (6)	30.3 ± 0.9 (7)	8.6 ± 0.7 (5)	38.8 ± 0.5 (5)	24.6	0.2	2	0.89	This study	104.5	Liner and Olson (1973)	51.33	-	0.502147	0.00978345	For this species, we predicted body mass from SVL with the equation provided in the section Mass-specific metabolic rate (Methods)	104.5	-	-	-	Liner and Olson (1973)	-	-	-	-	-
41	Sceloporus brownorum	Oviparous	This study	21.842	-101.714	2200	16.38	19.53	12.52	36.8 ± 0.52 (20)	34.5 ± 0.4 (19)	11.3 ± 0.44 (9)	42.5 ± 0.08 (5)	40	0.7	7.1	0.9	This study	54.1 ± 0.5 (5)	This study	4.1 ± 0.2 (5)	This study	0.107643	0.0262543	We used mean SVL and mean body mass of this species to performed the equation provided in the section Mass-specific metabolic rate(Methods)	56.9 ± 0.8 (14)	-	9 ± 0.9 (4)	1	This study	9	0.220944	2.3045	This study	0.862877
42	Sceloporus bulleri	Viviparous	Lambert and Wiens (2013)	20.216	-105.339	245	24.18	26.68	21.42	32.2 ± 0.52 (16)	31.9 ± 0.58 (18)	15.3 ± 0.7 (9)	37.3 ± 0.5 (9)	29.3	0.4	2.8	0.85	This study	93.6 ± 1.9 (3)	Escobedo-Galván et al. (2017)	35.47	-	0.380579	0.0107305	For this species, we predicted body mass from SVL with the equation provided in the section Mass-specific metabolic rate (Methods)	93.6 ± 1.9 (3)	-	6.7 ± 0.7 (3)	1	Escobedo-Galván et al. (2017)	-	-	-	-	-
43	Sceloporus carinatus	Oviparous	Lambert and Wiens (2013)	-	-	-	-	-	-	-	-	-	-	-	-	-	-	-	-	-	-	-	-	-	-	-	-	-	-	-	-	-	-	-	-
44	Sceloporus cautus	Oviparous	Lambert and Wiens (2013)	-	-	-	-	-	-	-	-	-	-	-	-	-	-	-	76.8	Ferguson et al. (2006a)	18.26	-	-	-	For this species, we predicted body mass from SVL with the equation provided in the section Mass-specific metabolic rate (Methods)	76.8	-	-	-	Ferguson et al. (2006)	-	-	-	-	-
45	Sceloporus chaneyi	Oviparous	Lambert and Wiens (2013)	-	-	-	-	-	-	-	-	-	-	-	-	-	-	-	47	Liner and Dixon (1994)	3.52	-	-	-	For this species, we predicted body mass from SVL with the equation provided in the section Mass-specific metabolic rate (Methods)	47	-	-	-	Liner and Dixon (1994)	-	-	-	-	-
46	Sceloporus chrysostictus	Oviparous	Lambert and Wiens (2013)	19.08	-91.05	2	26.56	28.63	23.77	37.9 ± 0.3 (4)	35.8 ± 1.28 (5)	19.2 ± 0.15 (2)	40.7 ± 0.5 (2)	-	-	-	-	This study	51.3 ± 0.97 (82)	Fitch (1978)	4.72	-	0.129961	0.0275566	For this species, we predicted body mass from SVL with the equation provided in the section Mass-specific metabolic rate (Methods)	51.3 ± 0.97 (82)	-	2.4 ± 0.5 (16)	2	Fitch (1978), Lee (2000)	2.45	0.537032	5.24807	Meiri et al., 2020	0.501414
47	Sceloporus clarkii	Oviparous	Lambert and Wiens (2013)	31.958	-112.808	522	21.36	30.25	12.98	33.7 ± 0.47 (33)	-	9.53 (3)	-	-	-	-	-	This study, Valdez-Villavicencio and Peralta-García (2012)	84.1 ± 1.6 (36)	Fitch (1978)	24.77	-	0.326823	0.0131959	For this species, we predicted body mass from SVL with the equation provided in the section Mass-specific metabolic rate (Methods)	84.1 ± 1.6 (36)	-	11.6 (23)	-	Fitch (1978), Fitch (1985)	13.8	1.31826	25.704	Meiri et al., 2020	0.707749
48	Sceloporus consobrinus	Oviparous	Lambert and Wiens (2013)	-	-	-	-	-	-	-	-	-	-	-	-	-	-	-	57 ± 0.7 (46)	Tinkle and Ballinger (1972), Sceloporus undulatus (Texas) = S. consobrinus)	6.72	-	-	-	For this species, we predicted body mass from SVL with the equation provided in the section Mass-specific metabolic rate (Methods)	57 ± 0.7 (46)	-	9.5 ± 0.4 (46)	3	Tinkle and Ballinger (1972), Sceloporus undulatus (Texas) = S. consobrinus)	7.45	0.549541	8.31764	Meiri et al., 2020	1.47665
49	Sceloporus couchii	Oviparous	Lambert and Wiens (2013)	-	-	-	-	-	-	-	-	-	-	-	-	-	-	-	50 ± 0.4 (36)	García-de la Peña et al. (2004)	4.33	-	-	-	For this species, we predicted body mass from SVL with the equation provided in the section Mass-specific metabolic rate (Methods)	50 ± 0.4 (36)	-	-	-	García-de la Peña et al. (2004)	-	-	-	-	-
50	Sceloporus cowlesi	Oviparous	Lambert and Wiens (2013)	26.806	-102.017	716	21.17	27.57	13.33	31.8 ± 1.49 (6)	35.6 ± 1.28 (8)	13.1 ± 1.43 (6)	41.6 ± 0.23 (6)	38.6	2.1	4.6	0.55	This study	62.4 ± 0.2 (2071)	Bateman and Chung-MacCoubrey (2012)	9.1	-	0.132951	0.0146112	For this species, we predicted body mass from SVL with the equation provided in the section Mass-specific metabolic rate (Methods)	62.4 ± 0.2 (2071)	29.7 (717)	9.9	4	Vinegar (1975), Bateman and Chung-MacCoubrey (2012), S. u. consobrinus = S. cowlesi	9.1	0.616595	8.91251	Meiri et al., 2020	2.51826
51	Sceloporus cozumelae	Oviparous	Lambert and Wiens (2013)	21.52	-87.678	2	25.83	27.7	23.3	36.5 ± 0.76 (12)	34.5 ± 0.29 (11)	17.7 ± 0.73 (4)	42.1 ± 0.59 (4)	-	-	-	-	This study	45.5 ± 0.6 (33)	Fitch (1978)	3.15	-	0.0864055	0.0274019	For this species, we predicted body mass from SVL with the equation provided in the section Mass-specific metabolic rate (Methods)	45.5 ± 0.6 (33)	-	3.4 ± 0.29 (9)	2	Fitch (1978), Ramírez-Bautista et al. (2020)	-	-	-	-	-
52	Sceloporus cryptus	Viviparous	Jiménez-Arcos et al. (2017)	17.33	-96.48	2072	17.06	19.22	14.97	29.4 ± 0.34 (22)	-	-	-	-	-	-	-	López-Alcaide et al. (2017)	67.1 (8)	Jiménez-Arcos et al. (2017)	11.61	-	0.131965	0.0113669	For this species, we predicted body mass from SVL with the equation provided in the section Mass-specific metabolic rate (Methods)	67.1 (8)	-	9 (4)	1	Jiménez-Arcos et al. (2017)	-	-	-	-	-
53	Sceloporus cyanogenys	Viviparous	Lambert and Wiens (2013)	25.604	-100.35	1283	19.13	23.73	13.7	31.1 ± 2.5 (3)	30.3 ±0.44 (6)	10.8 ± 0.4 (2)	39.6 ± 0.6 (2)	24.6	1.8	5.6	0.68	This study	106.6 ± 5.3 (7)	Hunsaker (1959)	54.87	-	0.484151	0.00882369	For this species, we predicted body mass from SVL with the equation provided in the section Mass-specific metabolic rate (Methods)	106.6 ± 5.3 (7)	29.6 ± 0.2 (14)	13.3 ± 1.6 (7)	1	Hunsaker (1959)	13.15	1.12202	37.1535	Meiri et al., 2020	0.397124
54	Sceloporus cyanostictus	Viviparous	Lambert and Wiens (2013)	-	-	-	-	-	-	-	-	-	-	-	-	-	-	-	69.6 (14)	Axtell and Axtell (1971)	13.13	-	-	-	For this species, we predicted body mass from SVL with the equation provided in the section Mass-specific metabolic rate (Methods)	69.6 (14)	-	-	-	Axtell and Axtell (1971)	-	-	-	-	-
55	Sceloporus druckercolini	Viviparous	This study	17.65	-100.523	2486	17.73	18.87	16.27	29.5 ± 1.61 (4)	33.6 ± 1.33 (5)	13.1 ± 0.28 (5)	42.5 ± 0.19 (5)	24.4	2.3	7.1	0.68	This study	84.4 ± 2.4 (2)	This study	25.06	-	0.236925	0.00945251	For this species, we predicted body mass from SVL with the equation provided in the section Mass-specific metabolic rate (Methods)	84.4 ± 2.4 (2)	-	9.5 ± 1.5 (2)	1	This study	9.5	0.847	17.25	This study	0.466464
56	Sceloporus dugesii	Viviparous	Lambert and Wiens (2013)	-	-	-	-	-	-	-	-	-	-	-	-	-	-	-	61.5 ± 0.7 (91)	Ramírez-Bautista and Dávila-Ulloa (2009)	8.67	-	-	-	For this species, we predicted body mass from SVL with the equation provided in the section Mass-specific metabolic rate (Methods)	61.5 ± 0.7 (91)	25.7 ± 1.6 (12)	4.6 ± 0.2 (51)	1	Ramírez-Bautista and Dávila-Ulloa (2009)	4.4	0.724436	8.51138	Meiri et al., 2020	0.374501
57	Sceloporus edbelli	Oviparous	Lemos-Espinal et al. (2015)	-	-	-	-	-	-	-	-	-	-	-	-	-	-	-	-	-	-	-	-	-	-	-	-	-	-	-	-	-	-	-	-
58	Sceloporus edwardtaylori	Oviparous	Lambert and Wiens (2013)	-	-	-	-	-	-	-	-	-	-	-	-	-	-	-	-	-	-	-	-	-	-	-	30 (17)	8.5 ± 0.5 (2)	-	Köhler and Heimes (2002)	-	-	-	-	-
59	Sceloporus exsul	Oviparous	Dixon and Lemos-Espinal (2010)	-	-	-	-	-	-	-	-	-	-	-	-	-	-	-	-	-	-	-	-	-	-	-	-	-	-	-	-	-	-	-	-
60	Sceloporus formosus	Viviparous	Lambert and Wiens (2013)	16.16	-96.5	2375	17.55	18.67	16.47	30.6 ± 0.45 (22)	-	-	-	-	-	-	-	López-Alcaide et al. (2017)	64.8 ± 1.1 (60)	Ramírez-Bautista and Pavón (2009)	10.33	-	0.132985	0.0128767	For this species, we predicted body mass from SVL with the equation provided in the section Mass-specific metabolic rate (Methods)	64.8 ± 1.1 (60)	30 ± 0.6 (18)	6.6 ± 0.6 (10)	1	Ramírez-Bautista and Pavón (2009)	7.115	1.12202	12.0226	Meiri et al., 2020	0.66401
61	Sceloporus gadoviae	Oviparous	Lambert and Wiens (2013)	19.178	-102.038	616	24.08	26.27	21.8	35.1 ± 0.66 (3)	34.6 ± 0.41 (3)	15.9 ± 0.28 (3)	41.2 ± 0.09 (3)	-	-	-	-	This study	62 (1)	This study	5.9 (1)	This study	0.124177	0.0210469	We used mean SVL and mean body mass of this species to performed the equation provided in the section Mass-specific metabolic rate(Methods)	50.4 ± 0.5 (72)	25	3.9 ± 0.14 (21)	2	Ramírez-Bautista et al. (2005)	3.75	0.724436	5.49541	Meiri et al., 2020	0.988693
62	Sceloporus gadsdeni	Viviparous	This study	25.652	-103.173	1146	20.9	26.57	13.97	32.1 (33)	32.7 ± 0.2 (33)	-	-	36.4	0.02	1.6	0.98	This study, Gadsden et al. (2018)	63.5 ± 1 (10)	Gadsden et al. (2018)	9.65	-	0.142239	0.0147419	For this species, we predicted body mass from SVL with the equation provided in the section Mass-specific metabolic rate (Methods)	63.5 ± 1 (10)	29.5	7	1	Gadsden et al. (2018)	-	-	-	-	-
63	Sceloporus goldmani	Oviparous	Méndez-de la Cruz, unpubl. data	-	-	-	-	-	-	-	-	-	-	-	-	-	-	-	-	-	-	-	-	-	-	-	-	-	-	-	-	-	-	-	-
64	Sceloporus graciosus	Oviparous	Lambert and Wiens (2013)	44.725*	-110.703*	2300	1.01	12.08	-9.85	30.9 ± 0.52 (41)	32.3 ± 0.32 (70)	9.1 ± 0.67 (5)	43.6 ± 1	-	-	-	-	Mueller (1969)	53.3 (40)	Tinkle (1973)	5.36	-	0.0832923	0.0155342	For this species, we predicted body mass from SVL with the equation provided in the section Mass-specific metabolic rate (Methods)	53.3 (40)	25.1 (25)	3.8 (72)	2	Tinkle (1973)	5.4	0.776247	6.30957	Meiri et al., 2020	1.32869
65	Sceloporus grammicus	Viviparous	Lambert and Wiens (2013)	19.318	-99.194	2320	15.5	17.45	13.23	31.9 ± 0.32 (95)	33.1 ± 0.27 (115)	10 ± 0.21 (100)	39.9 ± 0.16 (84)	22.7	1.4	11.2	0.9	Pasten-Téllez (unpubl. Data)	61.7 ± 4 (7)	This study	6.7 ± 1.1 (7)	This study	0.106514	0.0158976	We used mean SVL and mean body mass of this species to performed the equation provided in the section Mass-specific metabolic rate(Methods)	55 ± 1 (52)	30.1 ± 0.9 (11)	5.1 ± 0.3 (27)	1	Ramírez-Bautista et al. (2012)	4.755	0.47863	4.89779	Meiri et al., 2020	0.464676
66	Sceloporus grandaevus	Oviparous	Lambert and Wiens (2013)	24.203*	-109.897*	45	22.53	28.32	17.08	35.3 ± 0.34 (51)	-	-	-	-	-	-	-	Soulé (1963)	58.5 ± 0.5 (2)	Goldberg (2013)	7.33	-	0.148355	0.020246	For this species, we predicted body mass from SVL with the equation provided in the section Mass-specific metabolic rate (Methods)	58.5 ± 0.5 (2)	-	6.5 ± 0.5 (2)	-	Goldberg (2013)	-	-	-	-	-
67	Sceloporus heterolepis	Viviparous	Lambert and Wiens (2013)	-	-	-	-	-	-	-	-	-	-	-	-	-	-	-	-	-	-	-	-	-	-	-	-	-	-	-	-	-	-	-	-
68	Sceloporus horridus	Oviparous	Lambert and Wiens (2013)	18.652*	-99.199*	910	24.73	27.33	21.98	35.7 ± 0.2 (15)	-	-	43.2 ± 0.18 (15)	-	-	-	-	Lemos-Espinal et al. (1993)	86.32 ± 1 (41)	Valencia-Limón et al. (2014)	27.03	-	0.407186	0.0150644	For this species, we predicted body mass from SVL with the equation provided in the section Mass-specific metabolic rate (Methods)	86.32 ± 1 (41)	25.9 ± 0.4 (24)	15.3 ± 1 (9)	-	Valencia-Limón et al. (2014)	11.9	1	19.9526	Meiri et al., 2020	0.596413
69	Sceloporus hunsakeri	Oviparous	Lambert and Wiens (2013)	23.555	-109.86	500	20.77	25.88	15.78	34.3 ± 0.6 (8)	33.9 ± 0.68 (5)	17.1 ± 0.73 (4)	39.5 ± 0.35 (4)	32.7	0.04	1.33	0.97	This study	62.2 ± 1.7 (10)	This study	10.4 ± 1.1 (10)	This study	0.178597	0.0171728	We used mean SVL and mean body mass of this species to performed the equation provided in the section Mass-specific metabolic rate(Methods)	64.13 ± 0.8 (19)	-	7.5	2	Galina-Tessaro et al. (2015)	-	-	-	-	-
70	Sceloporus insignis	Viviparous	Lambert and Wiens (2013)	-	-	-	-	-	-	-	-	-	-	-	-	-	-	-	71.3	Rubio-Pérez (2002)	14.23	-	-	-	For this species, we predicted body mass from SVL with the equation provided in the section Mass-specific metabolic rate (Methods)	71.3	-	9	1	Rubio-Pérez (2002)	9	0.88	14.37	Rubio-Pérez, 2002	0.551148
71	Sceloporus internasalis	Viviparous	Méndez-de la Cruz et al. (1998)	18.36	-95.11	442	24.13	26.55	21.02	31.2 ± 0.43 (7)	-	-	-	-	-	-	-	López-Alcaide et al. (2017)	-	-	-	-	-	-	-	-	-	-	-	-	-	-	-	-	-
72	Sceloporus jalapae	Oviparous	Lambert and Wiens (2013)	-	-	-	-	-	-	-	-	-	-	-	-	-	-	-	47.96 ± 0.4	González-Espinoza et al. (2017)	3.76	-	-	-	For this species, we predicted body mass from SVL with the equation provided in the section Mass-specific metabolic rate (Methods)	47.96 ± 0.4	19	5.63 ± 0.3	2	González-Espinoza et al. (2017)	5.615	0.616595	4.16869	Meiri et al., 2020	1.66104
73	Sceloporus jarrovii	Viviparous	Lambert and Wiens (2013)	25.735	-103.676	1312	20.05	25.35	13.43	35.6 ± 0.78 (12)	32.1 ± 0.27 (9)	14.6 ± 0.67 (9)	39.5 ± 0.78 (5)	38	2.2	5.9	0.62	This study	66 ± 0.5 (80)	Gadsden and Estrada-Rodríguez (2007)	10.98	-	0.205652	0.018724	For this species, we predicted body mass from SVL with the equation provided in the section Mass-specific metabolic rate (Methods)	66 ± 0.5 (80)	28.5 ± 1.3 (7)	5.7 ± 0.4	1	Gadsden and Estrada-Rodríguez (2007)	6.7	1.09648	12.8825	Meiri et al., 2020	0.570262
74	Sceloporus licki	Oviparous	Lambert and Wiens (2013)	23.555	-109.86	500	20.77	25.88	15.78	33.5 ± 0.63 (9)	32.7 ± 0.64 (11)	17.2 ± 0.47 (5)	39 ± 0.6 (4)	32.7	0.01	0.95	0.99	This study	62.4 ± 1.9 (7)	This study	9.4 ± 0.9 (7)	This study	0.155598	0.016553	We used mean SVL and mean body mass of this species to performed the equation provided in the section Mass-specific metabolic rate(Methods)	63.83 ± 1 (13)	-	6	2	Galina-Tessaro et al. (2015)	-	-	-	-	-
75	Sceloporus lineatulus	Oviparous	Lambert and Wiens (2013)	-	-	-	-	-	-	-	-	-	-	-	-	-	-	-	-	-	-	-	-	-	-	-	-	-	-	-	-	-	-	-	-
76	Sceloporus lineolateralis	Viviparous	Rubio-Pérez (2002)	24.717	-104.1	1770	18.32	22.72	13.28	31.6 ± 0.59 (18)	30.3 ± 0.36 (12)	-	-	36.1	1.13	6.6	0.83	Lara-Resendiz et al. (2014a)	72.6	Rubio-Pérez (2002)	15.12	-	0.191565	0.0126678	For this species, we predicted body mass from SVL with the equation provided in the section Mass-specific metabolic rate (Methods)	72.6	-	10	1	Rubio-Pérez (2002)	-	-	-	-	-
77	Sceloporus lundelli	Viviparous	Lambert and Wiens (2013)	-	-	-	-	-	-	-	-	-	-	-	-	-	-	-	-	-	-	-	-	-	-	-	-	-	-	-	-	-	-	-	-
78	Sceloporus macdougalli	Viviparous	Lambert and Wiens (2013)	16.032	-95.42	50	27.86	28.92	26.7	31.2 ± 0.3 (11)	28.2 ± 1.2 (12)	11.7 ± 0.65 (5)	39.1 ± 0.43 (5)	33.8	0.22	2.42	0.91	This study	69.7 ± 4.4 (5)	This study	8.8 ± 0.5 (5)	This study	0.123673	0.0140537	We used mean SVL and mean body mass of this species to performed the equation provided in the section Mass-specific metabolic rate(Methods)	83.84 ± 1.3 (29)	36.9 ± 0.3 (46)	4 ± 0.4 (11)	1	Martínez-Bernal et al. (2019)	2.33	1.29	13.3	Rubio-Pérez, 2002	0.225992
79	Sceloporus maculosus	Oviparous	Lambert and Wiens (2013)	25.1367	-103.754	1389	21.66	26.75	15.52	34.3 ± 0.9 (52)	32.7 ± 0.3 (11)	-	-	31.8	2	5.9	0.66	This study	41.5 ± 1 (30)	This study	2.32	-	0.0578903	0.0249995	For this species, we predicted body mass from SVL with the equation provided in the section Mass-specific metabolic rate (Methods)	41.5 ± 1 (30)	-	-	-	This study	-	-	-	-	-
80	Sceloporus magister	Oviparous	Lambert and Wiens (2013)	31.016	-114.838	11	22.12	29.97	14.67	36.6 ± 1.93 (3)	34.9 ± 0.31 (5)	10.5 ± 0.38 (3)	39.7 ± 0.5 (2)	-	-	-	-	This study	95.04 (57)	Fitch (1978)	37.33	-	0.555694	0.0148855	For this species, we predicted body mass from SVL with the equation provided in the section Mass-specific metabolic rate (Methods)	95.04 (57)	32.5	8 (50)	2	Parker and Pianka (1973), Fitch (1978), Fitch (1985)	9.3	1.54882	26.3027	Meiri et al., 2020	1.09525
81	Sceloporus malachiticus	Viviparous	Lambert and Wiens (2013)	-	-	1400	-	-	-	32.3 ± 1.26 (10)	-	9.7 (7)	42.8 (7)	-	-	-	-	Van Berkum (1988)	75.49 ± 0.4 (208)	Fitch (1978)	17.24	-	0.223281	0.0129526	For this species, we predicted body mass from SVL with the equation provided in the section Mass-specific metabolic rate (Methods)	75.49 ± 0.4 (208)	-	6 ± 0.3 (44)	1	Fitch (1978), Fitch (1985)	5.25	1.04713	12.3027	Meiri et al., 2020	0.446847
82	Sceloporus megalepidurus	Viviparous	Lambert and Wiens (2013)	19.76	-97.604	2413	13.51	15.73	10.88	28.7 ± 0.76 (17)	33.8 ± 0.21 (16)	9 ± 0.33 (10)	39.2 ± 0.23 (10)	18.3	4.1	14.4	0.71	This study	45 ± 0.43	Godinez-Cano (1985)	3.04	-	0.0456565	0.015026	For this species, we predicted body mass from SVL with the equation provided in the section Mass-specific metabolic rate (Methods)	45 ± 0.43	22.7 (63)	2 ± 0.2	1	Godinez-Cano (1985, González-Ruiz (2014)	-	-	-	-	-
83	Sceloporus melanogaster	Viviparous	Martínez-Méndez et al. (2019)	20.874	-99.224	2537	16.53	18.87	13.77	30.3 ± 0.81 (13)	32.7 ± 0.44 (13)	8.5 ± 0.27 (9)	37.8 ± 0.41 (8)	22.1	1.9	9.7	0.8	This study	77.2 ± 4 (9)	This study	20.6 ± 3.5 (9)	This study	0.217957	0.0105804	We used mean SVL and mean body mass of this species to performed the equation provided in the section Mass-specific metabolic rate(Methods)	77.2 ± 4 (9)	-	-	-	This study	-	-	-	-	-
84	Sceloporus melanorhinus	Oviparous	Lambert and Wiens (2013)	18.012	-98.884	777	25.52	27.73	23.57	32.4 ± 2.55 (2)	-	-	-	-	-	-	-	This study	87.9 ± 1.2 (30)	Ramírez-Bautista et al. (2006)	28.73	-	0.330055	0.0114899	For this species, we predicted body mass from SVL with the equation provided in the section Mass-specific metabolic rate (Methods)	87.9 ± 1.2 (30)	34.2 ± 0.3 (110)	7.7 ± 0.33 (12)	1	Ramírez-Bautista et al. (2006)	7.7	1.77828	21.8776	Meiri et al., 2020	0.625879
85	Sceloporus merriami	Oviparous	Lambert and Wiens (2013)	29.191*	-102.972*	560	21.24	29.32	11.97	33.3 ± 0.1 (392)	-	-	-	-	-	-	-	Grant (1990)	47.58 ± 0.3 (113)	Fitch (1978)	3.66	-	0.0755651	0.0206266	For this species, we predicted body mass from SVL with the equation provided in the section Mass-specific metabolic rate (Methods)	47.58 ± 0.3 (113)	-	4.1 (127)	-	Fitch (1978), Fitch (1985)	4.105	0.549541	4.36516	Meiri et al., 2020	0.516789
86	Sceloporus minor	Viviparous	Lambert and Wiens (2013)	20.874	-99.2241	2537	16.53	18.87	13.77	27.7 ± 1 (17)	32.6 ± 0.29 (16)	9.6 ± 0.52 (10)	37.2 ± 0.33 (10)	23.3	4.2	8.6	0.51	This study	64.1 ± 1.3 (9)	This study	11.1 ± 0.7 (9)	This study	0.111311	0.010028	We used mean SVL and mean body mass of this species to performed the equation provided in the section Mass-specific metabolic rate(Methods)	65.3 ± 1.4 (39)	26.7 ± 0.2 (24)	5 ± 0.3 (15)	1	Ramírez-Bautista et al. (2014)	4.56	0.6948	7.73	This study	0.409869
87	Sceloporus mucronatus	Viviparous	Lambert and Wiens (2013)	19.208	-99.277	3508	10.06	11.38	8.13	31.3 ± 0.75 (17)	34 ± 0.33 (19)	5.9 ± 0.44 (9)	37.6 ± 0.49 (6)	23.7	2.7	11.7	0.77	This study	82.3 ± 2 (17)	This study	21.3 ± 1.4 (17)	This study	0.241893	0.0113565	We used mean SVL and mean body mass of this species to performed the equation provided in the section Mass-specific metabolic rate(Methods)	79.1	28.75 (1)	5.11 ± 0.24	1	Méndez-de la Cruz and Villagrán-Santa Cruz (1983), Méndez-de la Cruz et al. (1988)	4.69	1	18.6209	Meiri et al., 2020	0.251868
88	Sceloporus nelsoni	Oviparous	Lambert and Wiens (2013)	-	-	-	-	-	-	-	-	-	-	-	-	-	-	-	52.14 ± 0.59 (21)	Fitch (1978)	4.98	-	-	-	For this species, we predicted body mass from SVL with the equation provided in the section Mass-specific metabolic rate (Methods)	52.14 ± 0.59 (21)	-	6.25	-	Fitch (1978)	-	-	-	-	-
89	Sceloporus oberon	Viviparous	Lambert and Wiens (2013)	-	-	-	-	-	-	-	-	-	-	-	-	-	-	-	-	-	-	-	-	-	-	-	-	-	-	-	-	-	-	-	-
90	Sceloporus occidentalis	Oviparous	Lambert and Wiens (2013)	31.039	-115.765	882	16.09	22.82	10.6	33.8 ± 0.41 (31)	33.2 ± 0.92 (15)	10.8 ± 0.51 (9)	38.5 ± 0.55 (6)	28	0.3	5.6	0.94	This study	64.2 ± 4.6 (14)	This study	12.9 ± 0.8 (14)	This study	0.201939	0.0156542	We used mean SVL and mean body mass of this species to performed the equation provided in the section Mass-specific metabolic rate(Methods)	70.38 ± 1.4 (13)	25	7.96 ± 0.3 (84)	2	Goldberg (1974), Fitch (1978)	10.1	0.691831	13.4896	Meiri et al., 2020	1.03598
91	Sceloporus ochoterenae	Oviparous	Lambert and Wiens (2013)	17.437	-99.459	1300	23.01	24.73	21.2	32.6 ± 0.58 (14)	33.7 ± 0.31 (25)	-	-	33.9	0.27	4.6	0.94	This study	45.7 ± 0.9 (63)	Bustos-Zagal et al. (2011)	3.2	-	0.0646462	0.0202019	For this species, we predicted body mass from SVL with the equation provided in the section Mass-specific metabolic rate (Methods)	45.7 ± 0.9 (63)	23.12 ± 0.7 (22)	5 ± 0.4 (10)	-	Bustos-Zagal et al. (2011)	6.25	0.549541	3.80189	Meiri et al., 2020	0.9034
92	Sceloporus olivaceus	Oviparous	Lambert and Wiens (2013)	33.263*	-97.042*	166	18	28.1	7.52	32	32.7 (5)	-	-	-	-	-	-	Fitzpatrick et al. (1978)	100.7 (110)	Blair (1960)	45.33	-	0.450334	0.00993506	For this species, we predicted body mass from SVL with the equation provided in the section Mass-specific metabolic rate (Methods)	100.7 (110)	26.2 (151)	18.1 (244)	4	Blair (1960)	17.9	0.724436	24.5471	Meiri et al., 2020	2.11307
93	Sceloporus omiltemanus	Viviparous	Lambert and Wiens (2013)	17.592	-99.815	2371	18.01	19.48	16.4	29.9 ± 0.81 (10)	31.9 ± 0.45 (13)	8.9 ± 1.47 (3)	35.2 ± 0.2 (3)	23.1	1.4	8.1	0.83	This study	83.1 ± 1.6 (39)	Ramírez-Pinilla et al. (2009)	23.79	-	0.235231	0.00988664	For this species, we predicted body mass from SVL with the equation provided in the section Mass-specific metabolic rate (Methods)	83.1 ± 1.6 (39)	28.6	6.2 ± 0.4 (13)	1	Ramírez-Pinilla et al. (2009)	6.245	1.09648	18.6209	Meiri et al., 2020	0.367733
94	Sceloporus orcutti	Oviparous	Lambert and Wiens (2013)	31.039	-115.765	882	16.09	22.82	10.6	33.3 ± 0.61 (17)	33.1 ± 0.33 (16)	10.2 ± 1.75 (4)	36.2 ± 0.51 (4)	28	0.9	6.3	0.87	This study	72.8 ± 4.2 (14)	This study	18.7 ± 3.6 (14)	This study	0.256615	0.0137227	We used mean SVL and mean body mass of this species to performed the equation provided in the section Mass-specific metabolic rate(Methods)	92	-	11	-	Mayhew (1963)	10.1	1.54882	24.5471	Meiri et al., 2020	0.637267
95	Sceloporus ornatus caeruleus	Viviparous	Lambert and Wiens (2013)	-	-	-	-	-	-	-	-	-	-	-	-	-	-	-	-	-	-	-	-	-	-	-	-	-	-	-	-	-	-	-	-
96	Sceloporus ornatus ornatus	Viviparous	Lambert and Wiens (2013)	-	-	-	-	-	-	-	-	-	-	-	-	-	-	-	-	-	-	-	-	-	-	-	-	-	-	-	3.25	0.44	6.95	Rubio-Pérez, 2002	0.205755
97	Sceloporus palaciosi	Viviparous	Lambert and Wiens (2013)	19.265	-99.298	3168	10.98	12.45	8.8	28.2 ± 1.25 (3)	33.7 ± 0.73 (7)	8.8 ± 0.47 (7)	39.4 ± 0.27 (7)	13.2	2.7	19.6	0.86	This study	50.4 ± 0.4 (163)	Ramírez‐Bautista et al. (2019)	4.44	-	0.0583314	0.0131253	For this species, we predicted body mass from SVL with the equation provided in the section Mass-specific metabolic rate (Methods)	50.4 ± 0.4 (163)	26.5 ± 0.4 (82)	4 ± 0.2 (40)	1	Ramírez‐Bautista et al. (2019)	-	-	-	-	-
98	Sceloporus parvus	Oviparous	Lambert and Wiens (2013)	20.434	-98.746	2331	16.85	19.23	14.28	33 ± 0.49 (12)	32.7 ± 0.59 (14)	13.5 ± 0.4 (12)	40.3 ± 0.19 (12)	24.3	0	6.1	1	This study	44.2 ± 1.3 (5)	This study	3 ± 0.4 (5)	This study	0.0635461	0.021182	We used mean SVL and mean body mass of this species to performed the equation provided in the section Mass-specific metabolic rate(Methods)	46.85	-	3.8	-	Jiménez-Arcos et al. (2017)	3.4	0.42658	3.63078	Meiri et al., 2020	0.399465
99	Sceloporus pictus	Viviparous	Lambert and Wiens (2013)	-	-	-	-	-	-	-	-	-	-	-	-	-	-	-	47.86 ± 1.2 (7)	Fitch (1978)	3.74	-	-	-	For this species, we predicted body mass from SVL with the equation provided in the section Mass-specific metabolic rate (Methods)	47.86 ± 1.2 (7)	-	3.6 (5)	-	Fitch (1978)	-	-	-	-	-
100	Sceloporus poinsettii	Viviparous	Lambert and Wiens (2013)	24.717	-104.1	1770	18.32	22.72	13.28	32.7 ± 0.38 (17)	31.2 ± 0.49 (16)	-	-	36.1	0.45	5.9	0.93	Lara-Resendiz et al. (2014a)	85.8 ± 1.3 (37)	Gadsden et al. (2005)	26.49	-	0.317946	0.0120037	For this species, we predicted body mass from SVL with the equation provided in the section Mass-specific metabolic rate (Methods)	85.8 ± 1.3 (37)	32	6.3 ± 0.7 (6)	1	Ballinger (1973), Gadsden et al. (2005)	10.95	1.47911	29.5121	Meiri et al., 2020	0.5488
101	Sceloporus prezygus	Viviparous	Lambert and Wiens (2013)	16.9	-90.973	250	25.48	27.15	23.08	29.6 ± 0.7 (6)	33.2 ± 0.37 (4)	16 ± 0.55 (4)	38.9 ± 0.25 (4)	32.4	-	-	-	This study	79	Rubio-Pérez (2002)	20.08	-	0.202217	0.0100716	For this species, we predicted body mass from SVL with the equation provided in the section Mass-specific metabolic rate (Methods)	79	-	8	1	Rubio-Pérez (2002)	-	-	-	-	-
102	Sceloporus pyrocephalus	Oviparous	Lambert and Wiens (2013)	19.178	-102.038	616	-	-	-	36.1 ± 0.5 (17)	33.9 ± 0.44 (15)	16.2 ± 0.32 (9)	41.2 ± 0.54 (7)	41.2	0.5	6	0.91	This study	53.4 ± 0.4 (76)	Ramírez‐Bautista and Olvera-Becerril (2004)	5.4	-	0.125384	0.0232379	For this species, we predicted body mass from SVL with the equation provided in the section Mass-specific metabolic rate (Methods)	53.4 ± 0.4 (76)	26.1 ± 0.1 (15)	5.8 ± 0.3 (21)	2	Ramírez‐Bautista and Olvera-Becerril (2004)	5.23	0.851138	5.88844	Meiri et al., 2020	1.51193
103	Sceloporus samcolemani	Oviparous	Lemos-Espinal et al. (2015)	-	-	-	-	-	-	-	-	-	-	-	-	-	-	-	-	-	-	-	-	-	-	-	-	-	-	-	-	-	-	-	-
104	Sceloporus scalaris	Oviparous	Ramírez-Bautista et al. (2017)	-	-	-	-	-	-	-	-	-	-	-	-	-	-	-	53.2 ± 0.6 (74)	Ramírez-Bautista et al. (2017)	5.33	-	-	-	For this species, we predicted body mass from SVL with the equation provided in the section Mass-specific metabolic rate (Methods)	53.2 ± 0.6 (74)	-	8.7 ± 0.4 (38)	2	Ramírez-Bautista et al. (2017)	-	-	-	-	-
105	Sceloporus scitulus	Viviparous	Ramírez-Pinilla et al. (2009)	17.592	-99.815	2371	18.01	19.48	16.4	31.7 ± 1.08 (10)	30.9 ± 1.43 (7)	7.4 ± 2.1 (2)	37.6 (1)	17.7	0.3	9.1	0.96	This study	65.4 ± 1.1 (68)	Ramírez-Pinilla et al. (2009)	10.65	-	0.148454	0.0139369	For this species, we predicted body mass from SVL with the equation provided in the section Mass-specific metabolic rate (Methods)	65.4 ± 1.1 (68)	28.6	6.04 ± 0.5 (27)	1	Smith and Savitzky (1974), Ramírez-Pinilla et al. (2009)	-	-	-	-	-
106	Sceloporus serrifer	Viviparous	Lambert and Wiens (2013)	21.086	-89.614	7	26.09	28.02	23.45	31.1 ± 0.57 (21)	-	-	-	-	-	-	-	This study	91.2 ± 1.2 (58)	Rivera-Morales (2001)	32.51	-	0.326937	0.0100575	For this species, we predicted body mass from SVL with the equation provided in the section Mass-specific metabolic rate (Methods)	91.2 ± 1.2 (58)	33 (1)	8.1 ± 0.5	1	Rivera-Morales (2001)	8	0.55	20.32	Rubio-Pérez, 2002	0.216535
107	Sceloporus shannonorum	Viviparous	Méndez-de la Cruz et al. (1998)	-	-	-	-	-	-	-	-	-	-	-	-	-	-	-	-	-	-	-	-	-	-	-	-	-	-	-	-	-	-	-	-
108	Sceloporus siniferus	Oviparous	Lambert and Wiens (2013)	16.032	-95.42	50	27.86	28.92	26.7	36.6 ± 0.39 (34)	34.8 ± 0.14 (21)	16.7 ± 0.42 (10)	43 ± 0.23 (10)	34.2	0.86	4.37	0.8	This study	61.5 ± 1.2 (8)	This study	5.8 ± 0.5 (8)	This study	0.137516	0.0237096	We used mean SVL and mean body mass of this species to performed the equation provided in the section Mass-specific metabolic rate(Methods)	49.3 ± 1 (107)	26.9 ± 0.5 (52)	4.9 ± 0.4 (16)	2	Ramírez-Bautista et al. (2015)	-	-	-	-	-
109	Sceloporus slevini	Oviparous	Lambert and Wiens (2013)	31.902	-109.278	2664	9.07	16.65	1.95	32.2 (56)	35.6 (13)	-	44.8 (8)	-	-	-	-	Mathies and Andrews (1995), S. scalaris= S. slevini	50.5	Newlin (1976), Sceloporus scalaris = S. slevini	4.33	-	0.0785624	0.0181564	For this species, we predicted body mass from SVL with the equation provided in the section Mass-specific metabolic rate (Methods)	50.5	20.6 (7)	8.38 ± 0.5 (86)	1	Anderson (1962), Newlin (1976), Sceloporus scalaris = S. slevini	8.5	0.42658	4.57088	Meiri et al., 2020	0.793266
110	Sceloporus smaragdinus	Viviparous	Lambert and Wiens (2013)	15.104*	-92.104*	2468	14.36	15.35	12.93	28.7 ± 0.52 (11)	-	-	-	-	-	-	-	López-Alcaide et al. (2017)	62.2 ± 1.6 (17)	Fitch (1978)	9.02	-	0.103266	0.011447	For this species, we predicted body mass from SVL with the equation provided in the section Mass-specific metabolic rate (Methods)	62.2 ± 1.6 (17)	-	4.2 ± 0.3 (10)	1	Fitch (1978)	-	-	-	-	-
111	Sceloporus smithi	Oviparous	Lambert and Wiens (2013)	16.032	-95.42	50	27.86	28.92	26.7	33.7 ± 0.45 (9)	35.8 ± 1.4 (9)	13.8 ± 0.88 (4)	40.9 ± 0.27 (5)	33	1.12	2.32	0.51	This study	57.4	This study	6.88	-	0.124992	0.0181795	For this species, we predicted body mass from SVL with the equation provided in the section Mass-specific metabolic rate (Methods)	57.4	-	-	-	This study	-	-	-	-	-
112	Sceloporus sp MX14 4	Viviparous	Martínez-Méndez et al. (2019)	20.744	-103.515	1662	19.36	22.28	15.88	-	31.3 ± 0.72 (16)	13.2 ± 0.74 (10)	37.6 ± 0.56 (10)	25.6	-	-	-	This study	92.3 ± 1.8 (40)	Cruz-Saenz, Com. Pers.	29.3 ± 1.3 (40)	Cruz-Saenz, Com. Pers.	-	-	We used mean SVL and mean body mass of this species to performed the equation provided in the section Mass-specific metabolic rate(Methods)	92.9 ± 1.2 (76)	-	-	-	Cruz-Saenz, Com. Pers.	-	-	-	-	-
113	Sceloporus sp SFDG514	Viviparous	This study	23.562	-100.894	2843	13.94	16.93	10.12	32.5 ± 0.53 (5)	30.2 ± 1.02 (23)	8.8 ± 0.29 (11)	37.5 ± 0.29 (10)	18.8	0	7.3	1	This study	74.8 ± 4.2 (4)	This study	16.72	-	0.221625	0.0132588	For this species, we predicted body mass from SVL with the equation provided in the section Mass-specific metabolic rate (Methods)	74.8 ± 4.2 (4)	-	8.5 ± 1.3 (4)	1	This study	-	-	-	-	-
114	Sceloporus spinosus caeruleopunctatus	Oviparous	Lambert and Wiens (2013)	-	-	-	-	-	-	-	-	-	-	-	-	-	-	-	87.2 ± 1.6 (18)	Fitch (1978)	27.97	-	-	-	For this species, we predicted body mass from SVL with the equation provided in the section Mass-specific metabolic rate (Methods)	87.2 ± 1.6 (18)	-	12.9 ± 0.7 (17)	-	Fitch (1978), Calderón-Espinosa et al. (2006)	-	-	-	-	-
115	Sceloporus spinosus spinosus	Oviparous	Lambert and Wiens (2013)	19.735	-98.844	2441	15.1	17.1	12.72	31.3 ± 1.03 (3)	31.8 ± 1.63 (3)	16.9 ± 0.21 (3)	39.8 ± 0.09 (3)	26.2	0	3.4	1	This study	88.8 ± 1 (52)	Méndez-de la Cruz et al. (2013)	29.72	-	0.310581	0.0104486	For this species, we predicted body mass from SVL with the equation provided in the section Mass-specific metabolic rate (Methods)	88.8 ± 1 (52)	-	11.5 ± 0.7 (19)	1	Méndez-de la Cruz et al. (2013)	13.85	0.912011	18.6209	Meiri et al., 2020	0.678344
116	Sceloporus squamosus	Oviparous	Lambert and Wiens (2013)	-	-	-	-	-	-	35.3 (13)	-	-	-	-	-	-	-	Brattstrom (1965)	-	-	-	-	-	-	-	-	-	-	-	-	4.5	0.275423	4.46684	Meiri et al., 2020	0.277468
117	Sceloporus stejnegeri	Viviparous	Lambert and Wiens (2013)	17.154	-99.544	261	26.48	27.82	25.12	30 ± 0.83 (9)	33.1 ± 0.52 (8)	9.5 ± 0.71 (4)	37.4 ± 0.19 (3)	34.2	2.2	5.1	0.56	This study	78.4 ± 3.7 (6)	This study	15.7 ± 1.3 (6)	This study	0.173596	0.0110571	We used mean SVL and mean body mass of this species to performed the equation provided in the section Mass-specific metabolic rate(Methods)	78.4 ± 3.7 (6)	-	-	-	This study	-	-	-	-	-
118	Sceloporus subpictus	Viviparous	Lambert and Wiens (2013)	17.06	-97.66	1812	15.08	16.53	13.08	29.6 ± 0.4 (9)	-	-	-	-	-	-	-	López-Alcaide et al. (2017)	66.5 (41)	Jiménez-Arcos et al. (2017)	11.26	-	0.131092	0.0116371	For this species, we predicted body mass from SVL with the equation provided in the section Mass-specific metabolic rate (Methods)	66.5 (41)	-	13 (2)	1	Jiménez-Arcos et al. (2017)	-	-	-	-	-
119	Sceloporus sugillatus	Viviparous	Lambert and Wiens (2013)	-	-	-	-	-	-	-	-	-	-	-	-	-	-	-	-	-	-	-	-	-	-	-	-	-	-	-	-	-	-	-	-
120	Sceloporus taeniocnemis	Viviparous	Lambert and Wiens (2013)	-	-	-	-	-	-	-	-	-	-	-	-	-	-	-	-	-	-	-	-	-	-	-	-	-	-	-	-	-	-	-	-
121	Sceloporus teapensis	Oviparous	Méndez-de la Cruz et al. (1998)	-	-	-	-	-	-	-	-	-	-	-	-	-	-	-	-	-	-	-	-	-	-	-	-	-	-	-	-	-	-	-	-
122	Sceloporus torquatus	Viviparous	Lambert and Wiens (2013)	19.318	-99.194	2320	15.5	17.45	13.23	33.3 ± 0.27 (107)	33.2 ± 0.21 (116)	8.8 ± 0.2 (100)	39.2 ± 0.18 (87)	22.7	0.77	10.61	0.93	Domínguez-Guerrero et al. (2019)	79.5 ± 1.1 (58)	This study	16 ± 0.7 (58)	This study	0.228292	0.0142682	We used mean SVL and mean body mass of this species to performed the equation provided in the section Mass-specific metabolic rate(Methods)	90.6 ± 6.5	27.4 ± 0.9	6.5 ± 0.2 (50)	1	Feria-Ortiz et al. (2001)	8.05	1.07152	24.5471	Meiri et al., 2020	0.351395
123	Sceloporus tristichus	Oviparous	Lambert and Wiens (2013)	35.161	-111.736	2177	7.43	17.07	-1.43	33.6 ± 0.97 (39)	-	7.55 ± 0.9 (10)	-	-	-	-	-	This study	65.6 ± 1.1 (43)	Goldberg (2014b)	10.76	-	0.173556	0.0161274	For this species, we predicted body mass from SVL with the equation provided in the section Mass-specific metabolic rate (Methods)	65.6 ± 1.1 (43)	27 (1)	7 ± 0.5 (13)	2	Goldberg (2014b)	7.2	0.691831	9.54993	Meiri et al., 2020	1.04319
124	Sceloporus undulatus	Oviparous	Lambert and Wiens (2013)	33.556*	-81.731*	114	17.15	26.08	7.88	33.1 ± 0.4 (242)	32.9 (26)	11.4	40.4	-	-	-	-	Angilletta (2001), Angilletta et al. (2002a)	69 ± 0.8 (121)	Tinkle and Ballinger (1972)	12.75	-	0.189568	0.0148682	For this species, we predicted body mass from SVL with the equation provided in the section Mass-specific metabolic rate (Methods)	69 ± 0.8 (121)	24	7.4 ± 0.3 (46)	3	Tinkle and Ballinger (1972), Andrews et al. (2000)	9.13	0.724436	8.91251	Meiri et al., 2020	2.22634
125	Sceloporus unicanthalis	Oviparous	Ramírez-Bautista et al. (2017)	-	-	-	-	-	-	-	-	-	-	-	-	-	-	-	-	-	-	-	-	-	-	-	-	-	-	-	-	-	-	-	-
126	Sceloporus uniformis	Oviparous	Meiri et al. (2020)	-	-	-	24.18	26.68	21.42	-	-	-	-	-	-	-	-	-	91.5 ± 1.1 (51)	Goldberg (2012b)	32.87	-	-	-	For this species, we predicted body mass from SVL with the equation provided in the section Mass-specific metabolic rate (Methods)	91.5 ± 1.1 (51)	32.1 ± 4 (4)	6.48 ± 0.5 (21)	2	Goldberg (2012a)	6.6	1.14815	23.4423	Meiri et al., 2020	0.646508
127	Sceloporus utiformis	Oviparous	Lambert and Wiens (2013)	20.216	-105.339	245	-	-	-	36.6 ± 0.54 (5)	34 ± 0.37 (4)	15 ± 0.6 (7)	40.6 ± 0.53 (7)	32.2	0.5	4.3	0.87	This study	63.8 ± 0.5 (94)	Ramírez‐Bautista and Gutiérrez-Mayén (2003)	9.8	-	0.203837	0.0207945	For this species, we predicted body mass from SVL with the equation provided in the section Mass-specific metabolic rate (Methods)	63.8 ± 0.5 (94)	28.4 (90)	6.94 ± 0.28 (31)	2	Ramírez‐Bautista and Gutiérrez-Mayén (2003)	7.02	1.09648	8.70964	Meiri et al., 2020	1.76753
128	Sceloporus vandenburgianus	Oviparous	Lambert and Wiens (2013)	30.999	-115.558	2522	8.81	15.95	3.2	32.4 ± 0.29 (71)	33.9 ± 0.32 (23)	6.8 ± 0.32 (13)	38.8 ± 0.43 (10)	28	0.9	4.5	0.8	This study	53.6 ± 0.9 (10)	This study	5.5 ± 0.5 (10)	This study	0.0955333	0.0173697	We used mean SVL and mean body mass of this species to performed the equation provided in the section Mass-specific metabolic rate(Methods)	59.5 ± 0.8 (27)	-	-	-	This study	-	-	-	-	-
129	Sceloporus variabilis	Oviparous	Lambert and Wiens (2013)	19.906	-97.632	1402	16.84	19.15	13.72	28.3 ± 0.72 (18)	33.7 ± 0.45 (18)	10 ± 0.24 (10)	40.7 ± 0.37 (10)	24.7	2.2	7.7	0.72	This study	52.7 ± 0.51 (37)	Cruz-Elizalde and Ramírez-Bautista (2016)	5.16	-	0.0657909	0.0127452	For this species, we predicted body mass from SVL with the equation provided in the section Mass-specific metabolic rate (Methods)	52.7 ± 0.51 (37)	-	4.3 ± 0.3 (12)	2	Cruz-Elizalde and Ramírez-Bautista (2016)	3.85	0.794328	6.16595	Meiri et al., 2020	0.991952
130	Sceloporus virgatus	Oviparous	Lambert and Wiens (2013)	31.883*	-109.207*	1690	12.62	20.87	4.55	33.4 ± 0.4 (104)	-	-	-	-	-	-	-	Smith and Ballinger (1994)	59.7 (184)	Vinegar (1975)	7.84	-	0.134801	0.0171847	For this species, we predicted body mass from SVL with the equation provided in the section Mass-specific metabolic rate (Methods)	59.7 (184)	-	9.5	1	Vinegar (1975)	9.825	0.512861	6.30957	Meiri et al., 2020	0.798606
131	Sceloporus woodi	Oviparous	Lambert and Wiens (2013)	29.167*	-81.792*	48	20.82	26.75	14.1	33.7 ± 0.24	37.2	18.9 ± 0.32 (34)	40.4 ± 0.18 (34)	34.4	3.05	4.65	0.6	Neel (2016), Neel and McBrayer (2018)	50.5	Jackson and Telford (1974)	4.47	-	0.0905564	0.0202412	For this species, we predicted body mass from SVL with the equation provided in the section Mass-specific metabolic rate (Methods)	50.5	21.2	4.7 ± 0.3	2	Jackson and Telford (1974)	4.805	0.47863	6.30957	Meiri et al., 2020	0.728993
132	Sceloporus zosteromus	Oviparous	Lambert and Wiens (2013)	27.888	-113.696	78	20.45	25.88	15.8	33.9 ± 0.7 (12)	33.9 ± 0.62 (9)	11.4 ± 0.46 (6)	40.7 ± 0.42 (5)	26.8	0.57	5.75	0.9	This study	80 (1)	This study	20.8 (1)	This study	0.291202	0.0140001	We used mean SVL and mean body mass of this species to performed the equation provided in the section Mass-specific metabolic rate(Methods)	80 (1)	-	-	-	This study	6	1.14815	11.2202	Meiri et al., 2020	0.613976
133	Uma exsul	Oviparous	Lambert and Wiens (2013)	25.44	-102.923	1100	21.87	27.73	14.8	35.8 ± 0.91 (22)	36.3 ± 0.26 (20)	-	-	31.1	2	13.9	0.85	This study	66.8 ± 0.7 (47)	Gadsden et al. (2006)	11.44	-	0.215257	0.018822	For this species, we predicted body mass from SVL with the equation provided in the section Mass-specific metabolic rate (Methods)	66.8 ± 0.7 (47)	33.9 ± 0.7 (15)	3 ± 0.1 (10)	2	Gadsden et al. (2006)	2.75	1.69824	10	Meiri et al., 2020	0.934034
134	Uma inornata	Oviparous	Lambert and Wiens (2013)	-	-	-	-	-	-	-	-	-	-	-	-	-	-	-	81 (213)	Mayhew (1965)	21.83	-	-	-	For this species, we predicted body mass from SVL with the equation provided in the section Mass-specific metabolic rate (Methods)	81 (213)	-	2.9 ± 0.3 (7)	2	Mayhew (1965)	-	-	-	-	-
135	Uma notata	Oviparous	Lambert and Wiens (2013)	-	-	-	-	-	-	38.3	-	-	-	-	-	-	-	Cowles and Bogert (1944)	76 (214)	Mayhew (1966a)	17.63	-	0.360132	0.0204247	For this species, we predicted body mass from SVL with the equation provided in the section Mass-specific metabolic rate (Methods)	76 (214)	-	2.1 ± 0.3 (11)	2	Mayhew (1966a)	2.5	2.29087	16.9824	Meiri et al., 2020	0.674481
136	Uma paraphygas	Oviparous	Lambert and Wiens (2013)	26.889	-103.836	1129	20.49	26.77	12.9	38.8 ± 0.33 (20)	35.1 ± 0.28 (18)	-	-	38.7	0.72	6.9	0.89	This study	59.3 ± 0.5 (160)	Gadsden-Esparza et al. (1993)	7.67	-	0.20028	0.0261146	For this species, we predicted body mass from SVL with the equation provided in the section Mass-specific metabolic rate (Methods)	59.3 ± 0.5 (160)	-	3.1 ± 0.4 (11)	2	Gadsden-Esparza et al. (1993)	-	-	-	-	-
137	Uma rufopunctata	Oviparous	Goldberg (2012a)	31.572	-113.495	6	23.13	31.87	14.93	37.6 ± 1.52 (33)	-	-	-	-	-	-	-	This study	73.6 ± 1.2 (39)	Goldberg (2012a)	15.83	-	0.315086	0.0199013	For this species, we predicted body mass from SVL with the equation provided in the section Mass-specific metabolic rate (Methods)	73.6 ± 1.2 (39)	-	2.4 ± 0.2 (20)	2	Goldberg (2012b)	-	-	-	-	-
138	Uma scoparia	Oviparous	Lambert and Wiens (2013)	-	-	-	-	-	-	35.7	-	-	44.8	-	-	-	-	Brattstrom (1965), Whitfield and Livezey (1973)	83 (236)	Mayhew (1966b)	23.7	-	0.368918	0.0155682	For this species, we predicted body mass from SVL with the equation provided in the section Mass-specific metabolic rate (Methods)	83 (236)	-	3.8 ± 0.4 (8)	2	Mayhew (1966b)	2.855	2.51189	21.3796	Meiri et al., 2020	0.670867
139	Urosaurus auriculatus	Oviparous	Lambert and Wiens (2013)	-	-	-	-	-	-	36.3 (19)	-	-	43.5	-	-	-	-	Brattstrom (1955)	-	-	-	-	-	-	-	-	-	-	-	-	-	-	-	-	-
140	Urosaurus bicarinatus	Oviparous	Lambert and Wiens (2013)	16.929	-96.832	1183	19.37	20.92	17.67	33.2 ± 0.72 (8)	33.3 ± 0.64 (8)	13.1 ± 0.45 (4)	39.3 ± 0.25 (2)	34.7	0.5	4.5	0.9	This study	43.1 ± 0.2 (79)	Ramírez‐Bautista and Vitt (1998)	2.63	-	0.0584611	0.0222366	For this species, we predicted body mass from SVL with the equation provided in the section Mass-specific metabolic rate (Methods)	43.1 ± 0.2 (79)	22.2 ± 0.4 (54)	5.4 ± 1.1	2	Ramírez‐Bautista and Vitt (1998)	-	-	-	-	-
141	Urosaurus clarionensis	Oviparous	Brattstrom (1955)	-	-	-	-	-	-	36.4 (37)	-	-	41.8	-	-	-	-	Brattstrom (1955)	-	-	-	-	-	-	-	-	-	-	-	-	-	-	-	-	-
142	Urosaurus gadovi	Oviparous	Lambert and Wiens (2013)	-	-	-	-	-	-	-	-	-	-	-	-	-	-	-	-	-	-	-	-	-	-	-	-	-	-	-	-	-	-	-	-
143	Urosaurus graciosus	Oviparous	Lambert and Wiens (2013)	-	-	1900	-	-	-	37.7 (246)	-	-	-	-	-	-	-	Vitt et al. (1981)	52 ± 0.7 (7)	Vitt et al. (1978)	4.94	-	0.132451	0.0268362	For this species, we predicted body mass from SVL with the equation provided in the section Mass-specific metabolic rate (Methods)	52 ± 0.7 (7)	-	5.3 (23)	2	Vitt and Ohmart (1975), Vitt et al. (1978)	4.45	0.724436	5.12861	Meiri et al., 2020	1.25716
144	Urosaurus lahtelai	Oviparous	Grismer (2002)	-	-	-	-	-	-	-	-	-	-	-	-	-	-	-	-	-	-	-	-	-	-	-	-	-	-	-	-	-	-	-	-
145	Urosaurus nigricaudus	Oviparous	Lambert and Wiens (2013)	23.555	-109.86	500	20.77	25.88	15.78	34.3 ± 0.45 (24)	35.5 ± 0.53 (16)	16.2 ± 0.41 (10)	39.8 ± 0.25 (8)	31.9	0.37	1.98	0.82	This study	41.5 ± 1 (8)	This study	2.1 ± 0.2 (8)	This study	0.0537977	0.025618	We used mean SVL and mean body mass of this species to performed the equation provided in the section Mass-specific metabolic rate(Methods)	42.5 ± 0.9 (69)	-	4.1 ± 1.9 (29)	2	Romero-Schmidt et al. (1999), Vera-Chávez (2013)	4.5	0.549541	3.63078	Meiri et al., 2020	1.36221
146	Urosaurus ornatus	Oviparous	Lambert and Wiens (2013)	31.353	-106.565	1300	17.03	26.5	7.27	35.3 ± 0.2 (18)	38 ± 0.9 (18)	9.58	43.76	36.29	0.73	6	0.87	This study	51.5	Van Loben Sels and Vitt (1984)	4.78	-	0.107652	0.0225303	For this species, we predicted body mass from SVL with the equation provided in the section Mass-specific metabolic rate (Methods)	51.5	20	7.4 ± 0.3 (49)	2	Van Loben Sels and Vitt (1984)	7.4	0.467735	3.98107	Meiri et al., 2020	1.73885
147	Uta palmeri	Oviparous	Lambert and Wiens (2013)	-	-	-	-	-	-	-	-	-	-	-	-	-	-	-	63.5 ± 0.2 (260)	Hews (1996)	9.65	-	-	-	For this species, we predicted body mass from SVL with the equation provided in the section Mass-specific metabolic rate (Methods)	63.5 ± 0.2 (260)	28.9 ± 0.5 (8)	-	-	Hews (1996)	2.8	1.14815	9.33254	Meiri et al., 2020	0.344475
148	Uta squamata	Oviparous	Grismer (2002)	-	-	-	-	-	-	-	-	-	-	-	-	-	-	-	-	-	-	-	-	-	-	-	-	-	-	-	-	-	-	-	-
149	Uta stansburiana	Oviparous	Lambert and Wiens (2013)	30.436	-116.029	6	15.67	19.05	13.02	33.1 ± 0.68 (22)	34.7 ± 0.4 (17)	9.1 ± 0.64 (9)	40.6 ± 0.64 (5)	23.5	1.6	10.2	0.84	This study	44.8 ± 0.9 (13)	This study	3.7 ± 0.3 (13)	This study	0.0749524	0.0202574	We used mean SVL and mean body mass of this species to performed the equation provided in the section Mass-specific metabolic rate(Methods)	47.74	25.5	5.8	5	Parker and Pianka (1975), Sinervo et al. (2000)	3.8	0.512861	3.89045	Meiri et al., 2020	2.50469

## Sheet: ReadMe
	General notes
1	Climatic measurements (bio1, bio10 and bio11), and thermal physiological data (Tb, Tpref, CTmin and CTmax) are given in degrees Celsius.
2	Adult and offspring SVL (snout-vent length) are given in millimeters (mm)
3	Adult and offspring body mass are given in grams (g)
4	± Corresponds to 1 standard error and numbers within parentheses correspond to the sample size.
5	* Represents coordinates georeferencing with Google Earth.
6	CTmin and CTmax of Cophosaurus texanus were measured at 29.4051*N, -103.2038*W, Bashey and Dunham (1997). For these coordinates bio1= 19.17, bio10=27, and bio11=10.43
7	CTmax of Holbrookia maculata was measured at 34.1986*N, -103.3108*W, Sena (1978). For these coordinates bio1= 14.36, bio10=24.42, and bio11=4.22
8	CTmin and CTmax of Phrynosoma cornutum were measured at 32.2834*N, -106.7533*W, Prieto and Whitford (1971). For these coordinates bio1= 16.53, bio10=26.25, and bio11=7.1
9	CTmin and CTmax of Phrynosoma hernandesi were measured at 32.931*N, -105.7616*W, Prieto and Whitford (1971). For these coordinates bio1= 8.57, bio10=16.72, and bio11=0.77
10	Tb of Phrynosoma solare was measured at 32.206N, -110.9064W (this study). For these coordinates bio1= 20.87, bio10= 30.1, and bio11= 12.15
11	Tb of Sceloporus anahuacus was measured at 19.5456N, -99.4877W, Ávila-Bocanegra et al. (2012). For these coordinates bio1= 9.93, bio10= 11.4, and bio11= 7.72
12	Tb of Sceloporus clarkii was measured at 21.847N, -105.8845W, Valdez-Villavicencio and Peralta-García (2012).
13	CTmin and CTmax of Urosaurus ornatus were measured at 31.9581N, -112.8083W, This study. For these coordinates bio1= 21.36, bio10= 30.25, and bio11= 12.98

## Sheet: References
	References
1	Anderson, J. D. Egg Laying and nesting in Sceloporus scalaris slevini. Herpetologica 18, 162–164 (1962).
2	Andrews, R. M., Mathies, T. & Warner, D. A. Effect of incubation temperature on morphology, growth, and survival of juvenile Sceloporus undulatus. Herpetol. Monogr. 14, 420-431 (2000).
3	Angilletta, M. J. Thermal and physiological constraints on energy assimilation in a widespread lizard (Sceloporus undulatus). Ecology 82, 3044–3056 (2001).
4	Angilletta, M. J., Hill, T. & Robson, M. A. Is physiological performance optimized by thermoregulatory behavior?: A case study of the Eastern fence lizard, Sceloporus undulatus. J. Therm. Biol. 27, 199–204 (2002).
5	Arenas-Moreno, D. M. Termorregulación y riesgo de extinción de dos especies de Phrynosoma (Sauria: Phrynosomatidae) con diferente modo reproductor. (Universidad Nacional Autónoma de México, 2014).
6	Arriaga-Nava, G. Ciclos reproductivos y de los cuerpos grasos de una población de la lagartija vivípara Sceloporus anahuacus (Squamata: Phrynosomatidae) al sur del Valle de México. (Universidad Nacional Autónoma de México, 2010).
7	Arriaga-Nava, G. Dimorfismo sexual y superviviencia en Sceloporus anahuacus (Squamata: Phrynosomatidae). (Universidad Nacional Autónoma de México, 2013).
8	Ávila-Bocanegra, L. E., Smith, G. R., Woolrich-Piña, G. A. & Lemos-Espinal, J. A. Body temperatures of Sceloporus anahuacus from a montane zone of northeastern Estado de México, Mexico. Herpetol. Bull. 29–31 (2012).
9	Axtell, R. W. & Axtell, C. A. A new lizard (Sceloporus jarrovii cyanostictus) from the Sierra Madre of Coahuila, Mexico. Copeia 1971, 89-98 (1971).
10	Ballinger, R. E. Comparative demography of two viviparous iguanid lizards (Sceloporus jarrovi and Sceloporus poinsetti). Ecology 54, 269–283 (1973).
11	Ballinger, R. E., Tyler, E. D. & Tinkle, D. W. Reproductive ecology of a west Texas population of the Greater Earless Lizard, Cophosaurus texanus. Am. Midl. Nat. 88, 419-428 (1972).
12	Bashey, F. & Dunham, A. E. Elevational variation in the thermal constraints on and microhabitat preferences of the Greater Earless Lizard Cophosaurus texanus. Copeia 1997, 725–737 (1997).
13	Bateman, H. L. & Chung-MacCoubrey, A. Growth and activity of Sceloporus cowlesi (Southwestern fence lizard). Herpetol. Rev. 43, 39–41 (2012).
14	Beltrán-Sánchez, E., Mendoza Quijano, F. & Sherbrooke, W. C. Aspectos reproductivos del camaleon viviparo Phrynosoma taurus (Sauria: Phrynosomatidae) de Zumpango del Rio, Guerrero. Bol. Soc. Herpetol. Mex. 13, 37–41 (2005).
15	Blair, W. F. The rusty lizard, a population study. (University of Texas Press, 1960).
16	Brattstrom, B. H. Notes on the herpetology of the Revillagigedo Islands , Mexico. Am. Midl. Nat. 54, 219–229 (1955).
17	Brattstrom, B. H. Body temperatures of reptiles. Am. Midl. Nat. 73, 376–422 (1965).
18	Bustos-Zagal, M. G., Méndez-de La Cruz, F. R., Castro-Franco, R. & Villagrán-Santa Cruz, M. Ciclo reproductor de Sceloporus ochoterenae en el estado de Morelos, México. Rev. Mex. Biodiv. 82, 589–597 (2011).
19	Calderón-Espinosa, M. L., Andrews, R. M. & Méndez-de la Cruz, F. R. Evolution of egg retention in the Sceloporus spinosus group: Exploring the role of physiological, environmental, and phylogenetic factors. Herpetol. Monogr. 20, 147–158 (2006).
20	Christian, K. A. Thermoregulation by the Short-Horned Lizard (Phrynosoma douglassi) at high elevation. J. Therm. Biol. 23, 395–399 (1998).
21	Cowles, R. B. and & Bogert, C. M. A preliminary study of the thermal requirements of desert reptiles. Bull. Am. Museum Nat. Hist. 83, 261–296 (1944).
22	Cruz-Elizalde, R. & Ramírez-Bautista, A. Reproductive cycles and reproductive strategies among populations of the Rose-Bellied Lizard Sceloporus variabilis (Squamata: Phrynosomatidae) from central Mexico. Ecol. Evol. 6, 1753–1768 (2016).
23	Dixon, J. R. & Lemos-Espinal, J. A. Amphibians and reptiles of the state of Querétaro, México. (CONABIO, 2010).
24	Domínguez-Guerrero, S. F. et al. Interactions between thermoregulatory behavior and physiological acclimatization in a wild lizard population. J. Therm. Biol. 79, 135–143 (2019).
25	Escobedo-Galván, A. H., Flores-Guerrero, U. S., González-Solórzano, M. & López de la Cruz, J. J. Sceloporus bulleri (Buller´s Spiny Lizard). Reproduction. Herpetol. Rev. 48, 854–855 (2017).
26	Ferguson, G. M., Smith, H. M., Liner, E. A. & Chiszar, D. Sceloporus cautus. Cat. Am. Amphib. Rept. 835, 1–5 (2006).
27	Feria-Ortiz, M., Nieto-Montes de Oca, A. & Ugarte-Salgado, I. H. Diet and reproductive biology of the viviparous lizard Sceloporus torquatus torquatus (Squamata: Phrynosomatidae). J. Herpetol. 35, 104–112 (2001).
28	Fitch, H. S. Sexual size differences in the genus Sceloporus. Univ. Kansas Sci. Bull. 51, 441–461 (1978).
29	Fitch, H. S. Variation in clutch and litter size in New World reptiles. Miscellaneous Publications of the Museum of Natural History of Kansas 76 (1985).
30	Fitzgerald, L. A., Painter, C. W., Hibbitts, T. J., Ryberg, W. A. & Smolensky, N. The range and distribution of Sceloporus arenicolus in Texas: Results of surveys conducted 8-15 June 2011. Final report, Texas A&M University (2011).
31	Fitzpatrick, L. C., Hughes, J. L. & Venables, B. J. Relations between preferred body temperatures and metabolic compensation in the Rusty Lizard Sceloporus olivaceus. Comp. Biochem. Physiol. Part A Physiol. 59, 13–16 (1978).
32	Gadsden-Esparza, H., Méndez-De la Cruz, F. R., Gil-Martínez, R. & Casas-Andreu, G. Patrón reproductivo de una lagartija (Uma paraphygas) en peligro de extinción. Bol. Soc. Herpetol. Mex. 5, 42–50 (1993).
33	Gadsden, H., Rodríguez-Romero, F. de J., Méndez-De la Cruz, F. R. & Gil-Martínez, R. Ciclo reproductor de Sceloporus poinsettii Baird y Girard 1852 (Squamata: Phrynosomatidae) en el centro del Desierto Chihuahuense, México. Acta Zool. Mex. 21, 93–107 (2005).
34	Gadsden, H., Dávila-Carrazco, M. de la L. & Gil-Martínez, R. Reproduction in the arenicolous mexican lizard Uma exsul. J. Herpetol. 40, 117–122 (2006).
35	Gadsden, H. & Estrada-Rodríguez, J. L. Ecology of the spiny lizard Sceloporus jarrovii in the Central Chihuahuan Desert. Southwest. Nat. 52, 600–608 (2007).
36	Gadsden, H. et al. Ecology of Sceloporus gadsdeni (Squamata : Phrynosomatidae) from the central Chihuahuan Desert , Mexico. Phyllomedusa 17, 181–193 (2018).
37	Galina-Tessaro, P. et al. Informe final del Proyecto HK012 Contribución a la distribución, ecología y estado de conservación de dos especies del género Sceloporus, endémicas de la región del Cabo, Baja California Sur. www.conabio.gob.mx (2015).
38	García-de la Peña, C., Contreras-Balderas, A., Castañeda, G. & Lazcano, D. Infestación y distribución corporal de la nigua Eutrombicula alfreddugesi (Acari: trombiculidae) en el lacertilio de las rocas Sceloporus couchii (Sauria: Phrynosomatidae). Acta Zool. Mex. 20, 159–165 (2004).
39	García-Pareja, M. Ecología de anidación de Phrynosoma asio en el límite de su distribución altitudinal en Guerrero, México. (Universidad Nacional Autónoma de México, 2017).
40	Godinez-Cano, E. Ciclo reproductivo de Sceloporus megalepidurus megalepidurus Smith (Reptilia: Sauria: Iguanidae), en la parte oriental de Tlaxcala, México. (Universidad Nacional Autónoma de México, 1985).
41	Goldberg, S. R. & Beaman, K. R. Reproduction in the San Lucan Banded Rock Lizard, Petrosaurus thalassinus (Phrynosomatidae) from Baja California Sur, Mexico. Bull. South. Calif. Sci. 103, 147–149 (2004).
42	Goldberg, S. R. Reproduction in the Short-Horned Lizard Phrynosoma douglassi in Arizona. Herpetologica 27, 311–314 (1971).
43	Goldberg, S. R. Reproduction in mountain and lowland populations of the lizard Sceloporus occidentalis. Copeia 1974, 182 (1974).
44	Goldberg, S. R. Reproduction of the Elegant Earless Lizard, Holbrookia elegans (Squamata: Phrynosomatidae) from Arizona, New Mexico, Sinaloa and Sonora. Texas J. Sci. 62, 281–286 (2010).
45	Goldberg, S. R. Reproduction of the Cape Horned Lizard, Phrynosoma coronatum (Squamata: Phrynosomatidae) from Baja California Sur, Mexico. Bull. South. Calif. Acad. Sci. 110, 56–58 (2011).
46	Goldberg, S. R. Reproduction of the Yellow-Backed spiny lizard, Sceloporus uniformis (Squamata: Phrynosomatidae) from California. Bull. South. Calif. Acad. Sci. 111, 25–28 (2012a).
47	Goldberg, S. R. Reproduction in the Yuman Fringe-Toed Lizard, Uma rufopunctata (Squamata: Phrynosomatidae). Southwest. Nat. 57, 456–457 (2012b).
48	Goldberg, S. R. Sceloporus grandaevus (Cerralvo Island Sator). Reproduction. Herpetol. Rev. 44, 683 (2013).
49	Goldberg, S. R. Sceloporus angustus (Santa Cruz Island Sator). Reproduction. Herpetol. Rev. 45, 699 (2014a).
50	Goldberg, S. R. Notes on reproduction of Plateau Fence Lizards, Sceloporus tristichus (Squamata: Phrynosomatidae). Bull. Chicago Herpetol. Soc. 49, 128–130 (2014b).
51	González-Espinoza, J. E., Lemos-Espinal, J. A., Manríquez-Morán, N. L. & Woolrich-Piña, G. Reproductive cycle of the oviparous lizard Sceloporus jalapae, from Zapotitlán Salinas, Puebla, Mexico. Acta Zool. 100, 36–42 (2017).
52	González-Ruiz, M. Dimorfismo sexual en una población de la lagartija Sceloporus megalepidurus (Squamata: Phrynosomatidae) que habita en una comunidad de matorral xerófilo al este de Puebla. (Universidad Nacional Autónoma de México, 2014).
53	Grant, B. W. Trade-offs in activity time and physiological performance for thermoregulating desert lizards, Sceloporus merriami. Ecology 71, 2323–2333 (1990).
54	Grismer, L. L. Amphibians and reptiles of Baja California, including its Pacific islands, and the islands in the Sea of Cortés. (University of California Press, 2002).
55	Grummer, J. A. & Bryson, R. W. A new species of bunchgrass lizard (Squamata: Phrynosomatidae) from the southern sky islands of the Sierra Madre Occidental, Mexico. Zootaxa 3790, 439–450 (2014).
56	Hernández-Ibarra, X. & Ramírez-Bautista, A. Reproductive characteristics of the Roundtail Horned Lizard, Phrynosoma modestum (Phrynosomatidae), from the Chihuahuan Desert of Mexico. Southwest. Nat. 47, 141 (2002).
57	Hernández-Ríos, A. Termorregulación y hábitat de Phrynosoma braconnieri en Sierra Norte de Oaxaca. (Universidad Nacional Autónoma de México, 2016).
58	Hews., D. K. Size and scaling of sexually-selected traits in the lizard, Uta palmeri. J. Zool. 238, 743–757 (1996).
59	Howard, C. W. Comparative reproductive ecology of horned lizards (genus Phrynosoma) in southwestern United States and northern Mexico. J. Arizona Acad. Sci. 9, 108-116 (1974).
60	Hughes, D. F., Meshaka, W. E., Lieb, C. S. & Pechmann, J. H. K. Latitudinal variation in life history reveals a reproductive disadvantage in the Texas Horned Lizard (Phrynosoma cornutum). bioRxiv 1–29 (2018) doi:10.1101/364091.
61	Hult, S. M. & Germano, D. J. Populations structure, size, and activity patterns of Phrynosoma blainvillii in the San Joaquin desert of California. Herpetol. Conserv. Biol. 10, 839–849 (2015).
62	Hunsaker, D. Birth and litter sizes of the Blue Spiny Lizard Sceloporus cyanogenys. Copeia 1959, 260-261 (1959).
63	Jackson, J. F. & Telford, S. R. Reproductive ecology of the Florida Scrub Lizard, Sceloporus woodi. Copeia 1974, 694 (1974).
64	Jiménez-Arcos, V. H., Sanabria-Urbán, S. & Cueva del Castillo, R. The interplay between natural and sexual selection in the evolution of sexual size dimorphism in Sceloporus lizards (Squamata: Phrynosomatidae). Ecol. Evol. 7, 905–917 (2017).
65	Jones, S. M. & Ballinger, R. E. Comparative life histories of Holbrookia maculata and Sceloporus undulatus in western Nebraska. Ecology 68, 1828–1838 (1987).
66	Judd, F. W. Activity and thermal ecology of the Keeled Earless Lizard , Holbrookia propinqua. Herpetologica 31, 137–150 (1975).
67	Judd, F. W. & Ross, R. K. Year-to-year variation in clutch size of island and mainland populations of Holbrookia propinqua (Reptilia, Lacertilia, Iguanidae). J. Herpetol. 12, 207 (1978).
68	Köhler, G. & Heimes, P. Stachelleguane: Lebensweise, Pflege, Zucht. (Herpeton, 2002).
69	Lahti, M. E., Beck, D. D. & Cottrell, T. R. Ecology of the Pygmy Short-Horned Lizard [Phrynosoma (Tapaja) douglasii] in Washington. Northwest. Nat. 91, 134–144 (2010).
70	Lambert, S. M. & Wiens, J. J. Evolution of viviparity: A phylogenetic test of the cold-climate hypothesis in phrynosomatid lizards. Evolution 67, 2614–2630 (2013).
71	Lara-Reséndiz, R. A. Eficiencia de la termorregulación y modelación del nicho ecológico de dos especies hermanas de Sceloporus con diferente modo reproductor. (Universidad Nacional Autónoma de México, 2008).
72	Lara-Reséndiz, R. A. & García-Vázquez, U. O. Sceloporus anahuacus (Anahuacan Graphic Lizard). Selected body temperature. Herpetol. Rev. 44, 682–683 (2013).
73	Lara-Reséndiz, R. A., Díaz De La Vega-Pérez, A. H., Jiménez-Arcos, V. H., Gadsden, H. & Méndez-De La Cruz, F. R. Termorregulación de dos poblaciones de lagartijas simpátridas: Sceloporus lineolateralis y Sceloporus poinsettii (Squamata: Phrynosomatidae) en Durango, México. Rev. Mex. Biodiv. 85, 875–884 (2014a).
74	Lara-Resendiz, R. A., Jezkova, T., Rosen, P. C. & Méndez-De La Cruz, F. R. Thermoregulation during the summer season in the Goode’s Horned Lizard Phrynosoma goodei (Iguania: Phrynosomatidae) in Sonoran Desert. Amphib. Reptil. 35, 161–172 (2014b).
75	Lara-Reséndiz, R. A. et al. Selected body temperature of nine species of Mexican horned lizards (Phrynosoma). Rev. Mex. Biodiv. 86, 275–278 (2015a).
76	Lara-Reséndiz, R. A., Gadsden, H., Rosen, P. C., Sinervo, B. & Méndez-De la Cruz, F. R. Thermoregulation of two sympatric species of horned lizards in the Chihuahuan Desert and their local extinction risk. J. Therm. Biol. 48, 1–10 (2015b).
77	Lee, J. C. A field guide to the amphibians and reptiles of the Maya world: The lowlands of Mexico, Northern Guatemala, and Belize. (Cornell University Press, 2000).
78	Lemos-Espinal, J. A., Ballinger, R. E. & Javelly-Gurria, J. M. Observations on the sensitivity to high temperatures in two lizard species (Ameiva undulata and Sceloporus horridus) from Zacatepec, Morelos, Mexico. Bull. Maryl. Herpetol. Soc. 29, 24–29 (1993).
79	Lemos-Espinal, J. A., Smith, H. M., Dixon, J. R. & Cruz, A. Amphibians and Reptiles of Sonora, Chihuahua and Coahuila, Mexico. vol. 1 (Comisión Nacional para el Conocimiento y Uso de la Biodiversidad (CONABIO), 2015).
80	Liner, E. A. & Olson, R. E. Adults of the lizard Sceloporus torquatus binocularis Dunn. Herpetologica 29 53–55 (1973).
81	Liner, E. A. & Dixon, J. R. Sceloporus chaneyi. Cat. Am. Amph. Rep. 588, 1 (1994).
82	López-Alcaide, S., Nakamura, M., Smith, E. N. & Martínez-Meyer, E. Would behavioral thermoregulation enable pregnant viviparous tropical lizards to cope with a warmer world? Integr. Zool. 12, 379–395 (2017).
83	Lowe, C. H. & Howard, C. W. Viviparity and reproductive pattern in Phrynosoma ditmarsi in Sonora, Mexico. Southwest. Nat. 20, 265-270 (1975).
84	Manríquez-Morán, N. L., Villagrán-Santa Cruz, M. & Méndez-de la Cruz, F. R. Reproductive activity in females of the oviparous lizard Sceloporus aeneus. Southwest. Nat. 58, 325–329 (2013).
85	Martínez-Bernal, R. L., Chávez-Tapia, C. B. & García-Collazo, R. Aspectos de la reproducción, dieta y edad de la especie microendémica Sceloporus macdougalli Smith y Bumzahem, 1953 (Squamata: Phrynosomatidae), de Tehuantepec, Oaxaca. Rev. Zool. 30, 12–35 (2019).
86	Martínez-Méndez, N., Mejía, O., Ortega, J. & Méndez-de la Cruz, F. R. Climatic niche evolution in the viviparous Sceloporus torquatus group (Squamata: Phrynosomatidae). PeerJ 6, e6192 (2019).
87	Mathies, T. & Andrews, R. M. Thermal and reproductive biology of high and low elevation populations of the lizard Sceloporus scalaris: Implications for the evolution of viviparity. Oecologia 104, 101–111 (1995).
88	Mayhew, W. W. Reproduction in the Granite Spiny Lizard, Sceloporus orcutti. Copeia 1963, 144-152 (1963).
89	Mayhew, W. W. Reproduction in the Sand-Dwelling Lizard Uma inornata. Herpetologica 21, 39–55 (1965).
90	Mayhew, W. W. Reproduction in the arenicolous lizard Uma notata. Ecology 47, 9–18 (1966a).
91	Mayhew, W. W. Reproduction in the psammophilous lizard Uma scoparia. Copeia 1966, 114-122 (1966b).
92	Meiri, S., Feldman, A., Schwarz, R. & Shine, R. Viviparity does not affect the numbers and sizes of reptile offspring. J. Anim. Ecol. 89, 360–369 (2020).
93	Méndez-de la Cruz, F. R. & Villagrán-Santa Cruz, M. Contribución al conocimiento de la ecología y ciclo reproductor de la lagartija vivipara Sceloporus mucronatus mucronatus. (Universidad Nacional Autónoma de México, 1983).
94	Méndez-de la Cruz, F. R., Villagrán-Santa Cruz, M. & Andrews, R. M. Evolution of viviparity in the lizard genus Sceloporus. Herpetologica 54, 521–532 (1998).
95	Méndez-de la Cruz, F. R., Villagrán-Santa Cruz, M., López-Ortíz, M. L. & Hernández-Gallegos, O. Reproductive cycle of a high-elevation, oviparous lizard (Sceloporus spinosus: Reptilia: Phrynosomatidae). Southwest. Nat. 58, 54–63 (2013).
96	Mueller, C. F. Temperature and energy characteristics of the Sagebrush Lizard (Sceloporus graciosus) in Yellowstone National Park. Copeia 1969, 153–160 (1969).
97	Neel, L. K. The effects of thermal opportunity and habitat on physiological performance in ecologically distinct populations of the Florida Scrub Lizard Sceloporus woodi. (Georgia Southern University, 2016).
98	Neel, L. K. & McBrayer, L. D. Habitat management alters thermal opportunity. Funct. Ecol. 32, 2029–2039 (2018).
99	Newlin, M. E. Reproduction in the Bunch Grass Lizard, Sceloporus scalaris. Herpetologica 32, 171–184 (1976).
100	Nieto-Montes de Oca, A., Arenas-Moreno, D., Beltrán-Sánchez, E. & Leaché, A. D. A new species of horned lizard (genus Phrynosoma) from Guerrero, México, with an updated multilocus phylogeny. Herpetologica 70, 241–257 (2014).
101	Parker, W. S. Ecological observations on the Regal Horned Lizard (Phrynosoma solare) in Arizona. Herpetologica 27, 333–338 (1971).
102	Parker, W. S. & Pianka, E. R. Notes on the ecology of the iguanid lizard, Sceloporus magister. Herpetologica 29, 143–152 (1973).
103	Parker, W. S. & Pianka, E. R. Comparative ecology of populations of the lizard Uta stansburiana. Copeia 1975, 615-632 (1975).
104	Pianka, E. R. & Parker, W. S. Ecology of the iguanid lizard Callisaurus draconoides. Copeia 1972, 493-508 (1972).
105	Pianka, E. R. & Parker, W. S. Ecology of horned lizards: A review with special reference to Phrynosoma platyrhinos. Copeia 1975, 141–162 (1975).
106	Prieto, A. A. & Whitford, W. G. Physiological responses to temperature in the horned lizards, Phrynosoma cornutum and Phrynosoma douglassii. Copeia 1971, 498–504 (1971).
107	Ramírez‐Bautista, A. & Vitt, L. J. Reproductive biology of Urosaurus bicarinatus (Sauria: Phrynosomatidae) from a tropical dry forest of Mexico. Southwest. Assoc. Nat. 43, 381–390 (1998).
108	Ramírez‐Bautista, A. & Gutiérrez-Mayén, G. Reproductive ecology of Sceloporus utiformis (Sauria: Phrynosomatidae) from a tropical dry forest of México. J. Herpetol. 37, 1–10 (2003).
109	Ramírez‐Bautista, A. & Olvera-Becerril, V. Reproduction in the Boulder Spiny Lizard, Sceloporus pyrocephalus (Sauria: Phrynosomatidae), from a tropical dry forest of México. J. Herpetol. 38, 225–231 (2004).
110	Ramírez-Bautista, A., Ortíz-Cruz, A. L., Del Coro Arizmendi, M. & Campos, J. Reproductive characteristics of two syntopic lizard species, Sceloporus gadoviae and Sceloporus jalapae (Squamata: Phrynosomatidae), from Tehuacán Valley, Puebla, México. West. North Am. Nat. 65, 202–209 (2005).
111	Ramírez-Bautista, A., Luja, V. H., Balderas-Valdivia, C. & Ortiz-Pulido, R. Reproductive cycle of male and female spiny lizards, Sceloporus melanorhinus, in a tropical dry forest. Southwest. Assoc. Nat. 51, 157–162 (2006).
112	Ramírez-Bautista, A. & Dávila-Ulloa, E. G. Reproductive characteristics of a population of Sceloporus dugesii (Squamata: Phrynosomatidae) from Michoacán, Mexico. Southwest. Nat. 54, 400–408 (2009).
113	Ramírez-Bautista, A. & Pavón, N. P. Sexual dimorphism and reproductive cycle in the arboreal spiny lizard Sceloporus formosus Wiegmann (Squamata: phrynosomatidae) from central Oaxaca, México. Rev. Chil. Hist. Nat. 82, 553–563 (2009).
114	Ramírez-Bautista, A., Stephenson, B. P., Lozano, A., Uribe-Rodríguez, H. & Leyte Manrique, A. Atypical reproductive cycles in a population of Sceloporus grammicus (Squamata: Phrynosomatidae) from the Mexican Plateau. Ecol. Evol. 2, 1903–1913 (2012).
115	Ramírez-Bautista, A., Stephenson, B. P., Serrano Muñoz, C., Cruz-Elizalde, R. & Hernández-Salinas, U. Reproduction and sexual dimorphism in two populations of the polymorphic spiny lizard Sceloporus minor from Hidalgo, México. Acta Zool. 95, 397–408 (2014).
116	Ramírez-Bautista, A., Luría-Manzano, R., Cruz-Elizalde, R., Pavón, N. P. & Larry, D. W. Variation in reproduction and sexual dimorphism in the Long-Tailed Spiny Lizard, Sceloporus siniferus, from the southern Pacific coast of Mexico. Salamandra 51, 73–82 (2015).
117	Ramírez-Bautista, A., Cruz-Elizalde, R., Hernández-Salinas, U., Lozano, A. & Grummer, J. A. Reproductive trait variation in the Sceloporus scalaris species group (Squamata: Phrynosomatidae) from the Transvolcanic Belt, Mexico. Biol. J. Linn. Soc. 122, 838–849 (2017).
118	Ramírez‐Bautista, A. et al. Reproduction and sexual dimorphism in the viviparous lizard Sceloporus palaciosi (Squamata: Phrynosomatidae) from the Trans‐Mexican Volcanic Belt, Mexico. Acta Zool. 00, 1–14 (2019).
119	Ramírez-Bautista, A., Cruz-Elizalde, R., Galván-Hernández, D. M., Hernández-Salinas, U. & Berriozabal-Islas, C. Sexual dimorphism and reproductive characteristics of the Cozumel Spiny Lizard, Sceloporus cozumelae (Squamata: Phrynosomatidae) from Mexico. Curr. Herpetol. 39, 19–27 (2020).
120	Ramírez-Enríquez, Y. Variación ontogenética de la ecología térmica en lagarto cornudo del Cabo, Phrynosoma coronatum (Squamata: Phrynosomatidae). (Centro de Investigaciones Biológicas del Noroeste, S.C., 2018).
121	Ramírez-Pinilla, M. P., Calderón-Espinosa, M. L., Flores-Villela, O., Muñoz-Alonso, A. & Méndez de la Cruz, F. R. Reproductive activity of three sympatric viviparous lizards at Omiltemi, Guerrero, Sierra Madre del Sur, Mexico. J. Herpetol. 43, 409–420 (2009).
122	Rathburn, E., Skjerping, E. & Westervelt, L. Substrate temperature preference in Pygmy Short-Horned Lizards (Phrynosoma douglasii). Symp. Univ. Res. Creat. Expr. 36, (2015).
123	Rivera-Morales, J. F. Estrategia reproductora de la lagartija tropical Sceloporus serrifer en el estado de Yucatán. (Universidad Nacional Autónoma de México, 2001).
124	Rodríguez-Romero, F. de J. Demografía comparada de dos especies de lacertilios emparentados del genero Sceloporus (Sauria: Phrynosomatidae) con diferente modo reproductor. (Universidad Nacional Autónoma de México, 2004).
125	Romero-Schmidt, H. L., Ortega-Rubio, A. & Acevedo-Beltran, M. Reproductive characteristics of the Black-Tailed Brush Lizard, Urosaurus nigricaudus (Phrynosomatidae). Rev. Biol. Trop. 47, 1111–1115 (1999).
126	Rubio-Pérez, I. V. Análisis comparativo de caracteres de historias de vida en lagartijas del genero Sceloporus, grupo Torquatus: una propuesta filogenética. (Universidad Nacional Autónoma de México, 2002).
127	Ryberg, W. A., Hill, M. T., Lay, D. & Fitzgerald, L. A. Observations on the nesting ecology and early life history of the Dunes Sagebrush Lizard (Sceloporus arenicolus). West. North Am. Nat. 72, 582–585 (2012).
128	Sartorius, S. S., Amaral, J. P. S., Durtsche, R. D., Deen, C. M. & Lutterschmidt, W. I. Thermoregulatory accuracy, precision, and effectiveness in two sand-dwelling lizards under mild environmental conditions. Can. J. Zool. 80, 1966–1976 (2002).
129	Sena, A. P. Temperature relations and the critical thermal maximum of Holbrookia maculata maculata (Reptilia: Iguanidae). Southwest. Nat. 23, 41–50 (1978).
130	Sinervo, B., Svensson, E. & Comendant, T. Density cycles and an offspring quantity and quality game driven by natural selection. Nature 406, 985–988 (2000).
131	Smith, H. M. & Savitzky, A. H. Another cryptic associate of the lizard Sceloporus formosus in Guerrero, Mexico. J. Herpetol. 8, 297-303 (1974).
132	Smith, G. R. & Ballinger, R. E. Thermal ecology of Sceloporus virgatus from Southeastern Arizona, with comparison to Urosaurus ornatus. J. Herpetol. 28, 65–69 (1994).
133	Soulé, M. Aspects of thermoregulation in nine species of lizards from Baja California. Copeia 1963, 107–115 (1963).
134	Suárez-Rodríguez, O. et al. Relative clutch mass in Phrynosoma orbiculare (Squamata: Phrynosomatidae) in the Parque Estatal Sierra Morelos, Toluca, Estado de México. Rev. Mex. Biodiv. 89, 282–289 (2018).
135	Tanner, W. W. & Krogh, J. E. Ecology of the Zebra-Tailed Lizard Callisaurus draconoides at the Nevada Test Site. Herpetologica 31, 302–316 (1975).
136	Tinkle, D. W. & Ballinger, R. E. Sceloporus undulatus: A study of the intraspecific comparative demography of a lizard. Ecology 53, 570–584 (1972).
137	Tinkle, D. W. A Population analysis of the Sagebrush Lizard, Sceloporus graciosus in Southern Utah. Copeia 1973, 284-296 (1973).
138	Valdez-Villavicencio, J. H. & Peralta-García, A. Sceloporus clarkii (Clark´s Spiny Lizard). Body temperature. Herpetol. Rev. 43, 651 (2012).
139	Valencia-Limón, E. R., Castro-Franco, R. & Bustos Zagal, M. G. Dimorfismo sexual y ciclo reproductor de Sceloporus horridus horridus (Wiegmann 1939) (Sauria: Phrynosomatidae). Acta Zool. Mex. 30, 91–105 (2014).
140	Van Berkum, F. H. Latitudinal patterns of the thermal sensitivity of sprint speed in lizards. Am. Nat. 132, 327–343 (1988).
141	Van Loben Sels, R. C. & Vitt, L. J. Desert lizard reproduction: seasonal and annual variation in Urosaurus ornatus (Iguanidae). Can. J. Zool. 62, 1779–1787 (1984).
142	Vera-Chávez, M. Biología térmica y reproductiva, en dos poblaciones de Urosaurus nigricaudus en Baja California, México. (Universidad Nacional Autónoma de México, 2013).
143	Verdugo-Molina, J. E. Eficiencia en la termorregulación de Phrynosoma solare (Squamata: Phrynosomatidae) en Hermosillo, Sonora. (Universidad de Sonora, 2014).
144	Vinegar, M. B. Comparative aggression in Sceloporus virgatus, S. undulatus consobrinus, and S. u. tristichus (Sauria: Iguanidae). Anim. Behav. 23, 279–286 (1975).
145	Vitt, L. J. & Ohmart, R. D. Ecology, reproduction , and reproductive effort of the iguanid lizard Urosaurus graciosus on the Lower Colorado River. Herpetologica 31, 56–65 (1975).
146	Vitt, L. J., Van Loben Sels, R. C. & Ohmart, R. D. Ecological relationships among arboreal desert lizards. Ecology 62, 398–410 (1981).
147	Vitt, L. J., Van Loben Sels, R. C. & Ohmart, R. D. Lizard reproduction: Annual variation and environmental correlates in the iguanid lizard Urosaurus graciosus. Herpetologica 34, 241–253 (1978).
148	Whitfield, C. L. & Livezey, R. L. Thermoregulatory patterns in lizards. Physiol. Zool. 46, 285–296 (1973).
149	Wone, B. & Beauchamp, B. Movement, home range, and activity patterns of the horned lizard, Phrynosoma mcallii. J. Herpetol. 37, 679–686 (2003).
150	Zamudio, K. R. & Parra-Olea, G. Reproductive mode and female reproductive cycles of two endemic Mexican horned lizards (Phrynosoma taurus and Phrynosoma braconnieri). Copeia 2000, 222–229 (2000).
