# Supplementary material for: Exceptional parallelisms characterize the evolutionary transition to live birth in phrynosomatid lizards
Source: Research Square preprint supplement (doi:10.21203/rs.3.rs-127587/v1), 2021-01-12
Supplement: Supplementary file 5 [file 321e3b372e485ace50e98c93.xlsx]

## Sheet: Genetic Data
For each species below, we provide the corresponding GenBank accession numbers associated with different sources of genetic data.
	Mitochondrial genes					Nuclear genes
Species	12S	16S	ND1	ND2	ND4	BDNF	ECEL	RAG1	R35	PNN	PRLR	PTPN	TRAF6
Callisaurus draconoides	-	L41441	-	EU543792	AY141061	-	GQ895763	-	-	-	GQ896075	GQ896207	GQ895936
Cophosaurus texanus	-	L41442	-	EU543794	AY141062	-	GQ895764	-	-	-	GQ896076	GQ896208	GQ895937
Holbrookia approximans	-	-	-	AY328441.1	-	-	-	-	-	-	-	-	-
Holbrookia elegans	-	-	-	EU543797	-	-	-	-	-	-	-	-	-
Holbrookia lacerata	AF194268	-	-	EU543795	-	-	-	-	-	-	-	-	-
Holbrookia maculata	DQ385406	-	DQ385318	DQ385359	AY141063	DQ385341	GQ895765	DQ385416	-	-	GQ896077	GQ896209	GQ895938
Holbrookia propinqua	AF194276	-	-	AY297491	-	-	-	-		-	-	-	-
Petrosaurus mearnsi	L40444	L41450	-	-	AF210354	HQ876221	GQ895766	GQ896005	-	-	GQ896078	GQ896210	GQ895939
Petrosaurus repens	-	-	JN648478.1	-	JN648458.1	JN648397.1	-	JN648497.1	-	-	-	-	-
Petrosaurus thalassinus	L40445	L41451	-	AF049858	-	-	GQ895767	GQ896006	-	-	GQ896079	GQ896211	GQ895940
Phrynosoma asio	DQ385398	L41452	DQ385310	DQ385351	AY141048	DQ385321	-	DQ385409	-	-	-	-	GQ895941
Phrynosoma blainvillii	-	-	DQ385305	DQ385346	-	DQ385337	-	DQ385425	-	-	-	-	-
Phrynosoma braconnieri	-	-	-	-	AY141060	-	-	-	-	-	-	-	-
Phrynosoma cerroense	DQ385394	-	DQ385306	DQ385347	-	DQ385338	-	DQ385426	-	-	-	-	-
Phrynosoma cornutum	DQ385390	L41453	DQ385302	DQ385344	AY141049	DQ385323	-	DQ385411	-	-	-	-	-
Phrynosoma coronatum	DQ385396	-	DQ385308	DQ385349	AY141050	DQ385335	-	DQ385423	GQ464691	GQ464635	-	-	-
Phrynosoma ditmarsi	DQ385400	-	DQ385312	DQ385353	AY141051	DQ385333	-	DQ385421	-	-	-	-	-
Phrynosoma douglasii	-	-	-	-	AY141052	-	-	-	-	-	-	-	-
Phrynosoma goodei	DQ385391	-	DQ385303	DQ385345	-	DQ385331	-	DQ385420	-	-	-	-	-
Phrynosoma hernandesi	DQ385389	L41454	DQ385301	U82686	AY141053	DQ385324	-	DQ385412	-	-	GQ896080	GQ896212	GQ895942
Phrynosoma mcallii	DQ385402	-	DQ385314	DQ385355	AY141054	DQ385328	-	DQ385417	-	-	-	-	-
Phrynosoma modestum	DQ385397	L41455	DQ385309	DQ385350	AY141055	DQ385325	-	DQ385413	-	-	-	-	-
Phrynosoma orbiculare	DQ385399	-	DQ385311	DQ385352	AY141056	DQ385326	-	DQ385414	-	-	-	-	-
Phrynosoma platyrhinos	-	-	DQ385313	DQ385354	AY141057	DQ385330	GQ895768	DQ385419	-	-	GQ896081	GQ896213	GQ895943
Phrynosoma sherbrookei	KJ124089.1	-	KJ124155.1	-	KJ124137.1	KP820849.1	KP820811.1	KJ123993.1	KJ124023.1	KP820516.1	KP820506.1	-	KP820647.1
Phrynosoma solare	DQ385388	-	DQ385300	DQ385342	AY141058	DQ385327	-	DQ385415	-	-	-	-	-
Phrynosoma taurus	DQ385403	-	DQ385315	DQ385356	AY141059	DQ385329	-	-	-	-	-	-	-
Sceloporus acanthinus	-	-	-	-	-	KU765613.1	KU766412.1	-	KU768458.1	KU768031.1	KU768127.1	-	KU768955.1
Sceloporus adleri	AF000799	AF000839	-	AY297519	GQ895850	-	-	-	-	-	-	-	-
Sceloporus aeneus	-	-	-	-	U88279	-	-	-	-	-	-	-	-
Sceloporus albiventris	EF025751	-	-	-	EF025743	-	-	-	-	-	-	-	-
Sceloporus anahuacus	-	-	-	-	-	KU765595.1	KU766396.1	-	KU768441.1	KU768014	KU768111.1	-	KU768937.1
Sceloporus angustus	L40450	L41457	-	AF049859	AF210360	-	-	-	-	-	GQ896082	GQ896214	GQ895944
Sceloporus arenicolus	AF000823	AF000863	GQ464468	-	GQ895848	GQ464421	-	GQ464701	GQ464645	GQ464589	-	-	-
Sceloporus asper	-	-	-	-	-	KU765606.1	KU766405.1	-	KU768451.1	KU768024.1	KU768120.1	-	KU768948.1
Sceloporus aurantius	-	-	-	-	-	KU765620.1	KU766419.1	-	KU768465.1	KU768038.1	KU768134.1	KU768303.1	KU768962.1
Sceloporus aureolus	DQ525884	DQ525901	-	-	DQ525875	-	-	-	-	-	-	-	-
Sceloporus bicanthalis	EU086047	AF000840	GQ464469	-	U88269	EU085931	-	EU085725	GQ464659	GQ464603	-	-	-
Sceloporus bimaculosus	-	-	-	-	-	KU765591.1	KU766393.1	-	KU768437.1	KU768010.1	KU768108.1	-	KU768933.1
Sceloporus binocularis	AF000827	AF000867	-	-	-	-	-	-	-	-	-	-	-
Sceloporus brownorum	-	-	-	-	-	KU765657.1	-	-	KU768501.1	KU768072.1	KU768168.1	KU768319.1	-
Sceloporus bulleri	DQ525887	DQ525904	-	-	DQ525865	-	-	-	-	-	-	-	-
Sceloporus carinatus	-	-	-	AY297496	AF210348	-	-	-	-	-	-	-	-
Sceloporus cautus	AF440020	AF000841	AF440020	AY297522	GQ895840	GQ464447	-	GQ464727	GQ464671	GQ464615	-	-	-
Sceloporus chaneyi	-	-	-	-	U88291	-	-	-	-	-	-	-	-
Sceloporus chrysostictus	L40451.1	L41458	-	-	AF210367	-	-	-	-	-	-	-	-
Sceloporus clarkii	EU086041	L41459	GQ464471	AY297511	AF210344	EU085925	GQ895769	GQ896007	GQ464636	GQ464580	GQ896083	GQ896215	GQ895945
Sceloporus consobrinus	AF440035	AF000860	AF440035	-	-	-	-	-	-	-	-	-	-
Sceloporus couchii	AF000789	AF000829	GQ464472	-	AF210364	GQ464461	GQ895770	GQ896008	GQ464685	GQ464629	GQ896084	GQ896216	GQ895946
Sceloporus cowlesi	AF440062	AF000859	AF440062	-	DQ114111	-	GQ895787	GQ896026	-	-	GQ896101	GQ896232	GQ895964
Sceloporus cozumelae	AF000790	AF000830	-	-	-	-	-	-	-	-	-	-	-
Sceloporus cryptus	AF000802	AF000842	GQ464473	-	GQ895842	GQ464415	-	GQ464695	GQ464639	GQ464583	-	-	-
Sceloporus cyanogenys	AF154144	-	-	-	AF154193	-	-	-	-	-	-	-	-
Sceloporus cyanostictus	AF000825	AF000865	-	-	AF154195	-	-	-	-	-	-	-	-
Sceloporus druckercolini	-	-	-	-	-	KU765628.1	KU766466.1	-	KU768516.1	KU768088.1	KU768183.1	-	KU769013.1
Sceloporus dugesii	AF154170	-	GQ464474	-	AF154190	GQ464439	-	GQ464719	GQ464663	GQ464607	-	-	-
Sceloporus edbelli	AF440018.1	-	AF440018.1	-	-	-	-	-	-	-	-	-	-
Sceloporus edwardtaylori	EU086042	-	GQ464475	-	EU085837	EU085926	-	EU085720	GQ464638	GQ464582	-	-	-
Sceloporus exsul	-	-	-	-	-	KU765634.1	KU766431.1	-	KU768479.1	KU768050.1	KU768147.1	-	KU768975.1
Sceloporus formosus	L40455	L41462	GQ464476	AY297498	AF210346	GQ464416	GQ895771	GQ896009	GQ464640	GQ464584	GQ896085	GQ896217	GQ895947
Sceloporus gadoviae	AF000796	AF000836	GQ464477	-	AF210336	GQ464453	GQ895772	GQ896010	GQ464677	GQ464621	GQ896086	GQ896218	GQ895948
Sceloporus gadsdeni	KX831027.1	-	KX831063.1	-	KX890410.1	-	KX890441.1	-	-	-	-	-	KX890373.1
Sceloporus goldmani	-	-	-	-	U88290	-	-	-	-	-	-	-	-
Sceloporus graciosus	-	L41463	AF440090	AF049860	EU085839	EU085928	GQ895773	GQ896011	GQ464646	GQ464590	GQ896087	GQ896219	GQ895949
Sceloporus grammicus	AF154130	L41464	GQ464479	AY297509	AF210363	EU085929	GQ895774	GQ896012	GQ464648	GQ464592	GQ896088	GQ896220	GQ895950
Sceloporus grandaevus	-	-	GQ464480	-	AF210359	GQ464452	-	GQ464732	GQ464676	GQ464620	-	-	-
Sceloporus heterolepis	AF000803	AF000843	GQ464481	-	AF210341	GQ464425	-	-	GQ464649	GQ464593	-	-	-
Sceloporus horridus	EF025753	AF000844	-	-	EF025745	AY987976	-	GQ464717	GQ464661	GQ464605	-	-	-
Sceloporus hunsakeri	EU086020	AF000845	GQ464483	AY297506	EU085817	EU085846	-	EU085642	GQ464651	GQ464595	-	-	-
Sceloporus insignis	AF000806	AF000846	-	-	-	-	-	-	-	-	-	-	-
Sceloporus internasalis	-	-	-	-	-	KU765671.1	KU766464.1	-	KU768514.1	KU768086.1	KU768181.1	-	KU769011.1
Sceloporus jalapae	AF000797	AF000837	GQ464484	AY297504	U88293	GQ464456	GQ895775	GQ896013	GQ464680	GQ464624	GQ896089	GQ896221	GQ895951
Sceloporus jarrovii	AF154163	-	GQ464485	-	GQ464765	GQ464440	-	GQ464720	GQ464664	GQ464608	-	-	-
Sceloporus licki	EU086023	AF000848	GQ464486	-	EU085819	EU085847	-	EU085643	GQ464652	GQ464596	-	-	-
Sceloporus lineatulus	AF000810	AF000850	-	-	-	-	-	-	-	-	-	-	-
Sceloporus lineolateralis	AF000807	AF000847	GQ464487	-	AF154211	GQ464441	-	GQ464721	GQ464665	GQ464609	-	-	-
Sceloporus lundelli	-	-	-	AY297499	-	-	-	-	-	-	-	-	-
Sceloporus macdougalli	AF000809	AF000849	GQ464488	-	GQ895844	GQ464442	-	GQ464722	GQ464666	GQ464610	-	-	-
Sceloporus maculosus	EU086046	AF000838	GQ464489	AY297501	AF210352	EU085930	GQ895776	GQ896014	GQ464682	GQ464626	GQ896090	-	GQ895952
Sceloporus magister	AF440092	L41466	AF440092	AF528741	AF210345	EU085914	GQ895777	GQ896015	GQ464653	GQ464597	GQ896091	-	GQ895953
Sceloporus malachiticus	L41417	L41467	GQ464491	AY297518	GQ895852	GQ464417	-	GQ464697	GQ464641	GQ464585	-	-	-
Sceloporus megalepidurus	AF154131	AF000862	AF440093	-	AF210358	GQ464432	GQ895778	GQ896016	GQ464656	GQ464600	GQ896092	GQ896222	GQ895954
Sceloporus melanogaster	GQ464569	-	GQ464513	-	GQ464793	GQ464446	-	GQ464726	GQ464670	GQ464614	-	-	-
Sceloporus melanorhinus	AF000812	AF000852	GQ464493	-	GQ895846	GQ464413	-	GQ464693	GQ464637	GQ464581	-	-	-
Sceloporus merriami	L41418	L41468	GQ464494	AY297520	AF210349	GQ464459	GQ895779	GQ896017	GQ464683	GQ464627	GQ896093	GQ896223	GQ895955
Sceloporus minor	AF154138	-	-	-	AF154198	-	-	-	-	-	-	-	-
Sceloporus mucronatus	DQ525885	DQ525902	-	-	DQ525864	-	-	-	-	-	-	-	-
Sceloporus nelsoni	-	-	-	-	AF210351	-	-	-	-	-	-	-	-
Sceloporus oberon	AF000826	AF000866	-	-	AF154212	-	-	-	-	-	-	-	-
Sceloporus occidentalis	L41420	-	AF440023	AY297515	-	GQ464448	-	GQ464728	GQ464672	GQ464616	-	-	-
Sceloporus ochoterenae	AF000813	AF000853	GQ464497	AF528743	AF210332	GQ464457	-	GQ464737	GQ464681	GQ464625	-	-	-
Sceloporus olivaceus	AF440095	L41471	AF440095	AY297521	AF210361	GQ464434	GQ895780	GQ896018	GQ464658	GQ464602	GQ896094	GQ896224	GQ895956
Sceloporus omiltemanus	AF440094	AF440094	GQ464495	-	GQ464775	GQ464443	-	GQ464723	GQ464667	GQ464611	-	-	-
Sceloporus orcutti	EU086029	L41472	GQ464499	AY297508	EU085820	EU085916	-	EU085710	GQ464654	GQ464598	-	-	-
Sceloporus ornatus caeruleus	-	AF000854	GQ464500	-	AF154240	KU765654	-	-	KU768498	GQ464612	-	-	-
Sceloporus ornatus ornatus	DQ525879	DQ525896	-	-	DQ525862	-	-	-	-	-	-	-	-
Sceloporus palaciosi	-	-	GQ464501	-	-	GQ464426		GQ464706	GQ464650	GQ464594	-	-	-
Sceloporus parvus	AF000792	AF000832	GQ464502	-	AF210366	GQ464462	GQ895781	GQ896019	GQ464686	GQ464630	GQ896095	GQ896225	GQ895957
Sceloporus pictus	AF000791	AF000831	GQ464503	AY297500	AF210356	GQ464433	-	GQ464713	GQ464657	GQ464601	-	-	-
Sceloporus poinsettii	AF154176	-	GQ464504	-	AF154241	GQ464445	-	GQ464725	GQ464669	GQ464613	-	-	-
Sceloporus prezygus	DQ525880	DQ525897	-	-	DQ525870	-	-	-	-	-	-	-	-
Sceloporus pyrocephalus	AF000793	AF000833	GQ464505	AY297502	AF210353	GQ464454	GQ895783	GQ896021	GQ464678	GQ464622	GQ896097	GQ896227	GQ895959
Sceloporus samcolemani	-	-	-	-	JN985720.1	KU765648.1	KU766444.1	-	KU768492.1	KU768039.1	KU768160.1	KU768306.1	KU768988.1
Sceloporus scalaris	L41424	L41474	GQ464506	AF528742	AF210368	GQ464436	GQ895784	GQ896022	GQ464660	GQ464604	GQ896098	GQ896228	GQ895960
Sceloporus scitulus	-	-	-	-	-	KU765623.1	KU766422.1	-	KU768468.1	KU768041.1	KU768137.1	-	KU768965.1
Sceloporus serrifer	DQ525894	DQ525911	-	-	DQ525876	-	-	-	-	-	-	-	-
Sceloporus shannonorum	-	-	-	-	-	KU765640.1	KU766436.1	-	KU768484.1	KU768056.1	KU768153.1	-	KU768981.1
Sceloporus siniferus	AF000794	AF000834	GQ464507	AY297494	AF210350	GQ464460	-	GQ896023	GQ464684	GQ464628	GQ896099	GQ896229	GQ895961
Sceloporus slevini	-	-	-	-	JN985737.1	KU765603.1	KU766403.1	-	KF437197.1	KU768021.1	-	KU768323.1	KU768945.1
Sceloporus smaragdinus	EU086043	AF000855	-	AY297517	EU085838	EU085927	-	EU085721	-	-	-	-	-
Sceloporus smithi	AF000828	AF000868	GQ464508	-	GQ895849	GQ464463	-	GQ464743	GQ464687	GQ464631	-	-	-
Sceloporus sp MX14 4	EF608018	EF608026	-	-	EF608021	-	-	-	-	-	-	-	-
Sceloporus sp SFDG514	-	-	-	-	-	-	-	MW316652	-	MW316651	-	-	-
Sceloporus spinosus caeruleopunctatus	EF025755	-	GQ464509	-	EF025748	GQ464438	GQ895785	GQ896024	GQ464662	GQ464606	-	GQ896230	GQ895962
Sceloporus spinosus spinosus	EF025756	L41475	-	AY297525	EF025749	-	-	-	-	-	-	-	-
Sceloporus squamosus	-	-	-	AY297495	AF210347	-	-	-	-	-	-	-	-
Sceloporus stejnegeri	AF000816	AF000856	GQ464510	-	GQ895843	GQ464418	-	GQ464698	GQ464642	GQ464586	-	-	-
Sceloporus subpictus	AF000817	AF000857	GQ464511	-	AF210355	GQ464419	-	GQ464699	GQ464643	GQ464587	-	-	-
Sceloporus sugillatus	AF154187	-	-	-	AF154242	-	-	-	-	-	-	-	-
Sceloporus taeniocnemis	L41426	L41476	GQ464512	-	GQ895847	GQ464420	-	GQ464700	GQ464644	GQ464588	-	-	-
Sceloporus teapensis	-	-	-	-	-	KU765674.1	KU766435.1	-	KU768517.1	KU768089.1	-	KU768327.1	KU769014.1
Sceloporus torquatus	DQ525892	DQ525909	-	-	DQ525863	-	-	-	-	-	-	-	-
Sceloporus tristichus	AF440065	-	AF440065	-	-	-	-	-	-	-	-	-	-
Sceloporus undulatus	AF440075	-	AF440075	-	-	GQ464449	-	GQ464729	GQ464673	GQ464617	-	-	-
Sceloporus unicanthalis	-	-	-	-	-	KU765615.1	KU766414.1	-	KU768460.1	KU768033.1	KU768129.1	KU768299.1	KU768957.1
Sceloporus uniformis	-	-	-	-	-	KU765659.1	KU766454.1	-	KU768503.1	KU768074.1	KU768170.1	-	KU768999.1
Sceloporus utiformis	AF000795	AF000835	GQ464515	AF528740	AF210340	GQ464455	-	GQ896027	GQ464679	GQ464623	-	GQ896233	GQ895965
Sceloporus vandenburgianus	AF000821	AF000861	GQ464516	-	GQ895851	GQ464423	-	GQ464703	GQ464647	GQ464591	-	-	-
Sceloporus variabilis	EU086049	L41479	GQ464517	AY297507	AF210365	EU085933	GQ895788	GQ896028	GQ464688	GQ464632	GQ896102	GQ896234	GQ895966
Sceloporus virgatus	AF440085	L41480	AF440086	AY297516	DQ358009	GQ464450	-	GQ464730	GQ464674	GQ464618	-	-	-
Sceloporus woodi	AF440087	AF000858	AF440089	AY297513	GQ895845	GQ464451	-	GQ464731	GQ464675	GQ464619	-	-	-
Sceloporus zosteromus	AF000811	AF000851	GQ464520	AY297503	EU085824	EU085924	-	EU085718	GQ464655	GQ464599	-	-	-
Uma exsul	AF194265	-	-	EU543779	-	-	-	-	-	-	-	-	-
Uma inornata	AF194264	-	-	EU543785	-	-	-	-	-	-	-	-	-
Uma notata	-	L41483	-	EU543784	GQ895839	-	-	-	-	-	-	-	-
Uma paraphygas	AF194266	-	-	EU543780	-	-	-	-	-	-	-	-	-
Uma rufopunctata	-	-	-	EU543783	-	-	-	-	-	-	-	-	-
Uma scoparia	AF194261	-	-	EU543782	-	JF806029	GQ895789	GQ896029	-	-	GQ896103	GQ896235	GQ895967
Urosaurus auriculatus	-	-	JN648461.1	-	JN648441.1	JN648381.1	-	JN648481.1	-	-	-	-	-
Urosaurus bicarinatus	-	-	-	-	AF210338	-	GQ895790	GQ896030	-	-	GQ896104	GQ896236	GQ895968
Urosaurus clarionensis	-	-	JN648462.1	-	JN648442.1	JN648382.1	-	JN648482.1	-	-	-	-	-
Urosaurus gadovi	-	-	JN648471.1	-	JN648451.1	JN648391.1	-	JN648491.1	-	-	-	-	-
Urosaurus graciosus	L41433	L41484	-	AF049862	GQ895841	-	GQ895791	GQ896031	-	-	GQ896105	-	GQ895969
Urosaurus lahtelai	-	-	JN648465.1	-	JN648445.1	JN648385.1	-	JN648485.1	-	-	-	-	-
Urosaurus nigricaudus	L41435	L41486	GQ464521	-	AF210357	GQ464465	GQ895792	GQ896032	GQ464689	GQ464633	GQ896106	GQ896237	GQ895970
Urosaurus ornatus	-	L41487	-	AY297493	AY141065	-	GQ895793	GQ896033	-	-	GQ896107	GQ896238	GQ895971
Uta palmeri	L41437	L41488	-	-	-	-	GQ895794	GQ896034	-	-	GQ896108	GQ896239	GQ895972
Uta squamata	-	-	JN648474.1	-	JN648454.1	JN648394.1	-	JN648494.1	-	-	-	-	-
Uta stansburiana	DQ385408	L41489	DQ385320	DQ385361	AY141066	DQ385334	GQ895795	GQ896035	GQ464690	GQ464634	GQ896109	GQ896240	GQ895973
